# Supplementary material for: Temporal gene expression profiling of maslinic acid-treated Raji cells
Source: Royal Society of Chemistry journal article supplement (doi:10.1039/d0mo00168f), 2020-12-08

## Supporting Information

### Temporal Gene Expression Profiling of Maslinic Acid-Treated Raji Cells

Lau Wai Meng <sup>2</sup>, Menaga Subramaniam<sup>1,2</sup>, Hoe Han Goh<sup>3</sup>, **Lim Yang Mooi**<sup>1,2\*</sup>

#### Affiliation

<sup>1</sup>Department of Pre-Clinical Science, Faculty of Medicine and Health Sciences, Universiti Tunku Abdul Rahman, Lot PT21144, Jalan Sungai Long, Bandar Sungai Long, 43000 Kajang, Selangor, Malaysia

<sup>2</sup>Centre for Cancer Research, Faculty of Medicine and Health Sciences, Universiti Tunku Abdul Rahman, PT21144, Jalan Sungai Long, Bandar Sungai Long, 43000 Kajang, Selangor, Malaysia

<sup>3</sup>Institute of Systems Biology, Universiti Kebangsaan Malaysia, UKM Bangi, Bangi, Malaysia

#### Correspondence

Prof. Dr. Lim Yang Mooi, Department of Pre-Clinical Science, Faculty of Medicine and Health Sciences, Universiti Tunku Abdul Rahman, Lot PT21144, Jalan Sungai Long, Bandar Sungai Long, 43000 Kajang, Malaysia. E-mail: [ymlim@utar.edu.my](mailto:ymlim@utar.edu.my) Phone: +60390194722 ex178 Fax: +603 90191959

**Table 1S. Gene transcripts with a p-value of less than 0.05 and expression fold-change of  $\pm 2.0$  across at least 2 time-points**

| Transcripts<br>Cluster Id | p-value | Log of fold-change |         |          |          |          |
|---------------------------|---------|--------------------|---------|----------|----------|----------|
|                           |         | 4 hours            | 8 hours | 12 hours | 24 hours | 48 hours |
| 7959354                   | 1.3E-02 | -1.3058            | -1.5890 | -1.4932  | -1.1168  | -1.2231  |
| 8014891                   | 7.2E-05 | -1.3041            | -2.2011 | -2.2267  | -1.3784  | -1.3169  |
| 8122334                   | 8.4E-04 | -1.0944            | -2.1491 | -2.2478  | -2.3706  | -2.1508  |
| 8104901                   | 2.8E-05 | -1.0246            | -1.3624 | -1.8409  | -1.2404  | -1.8301  |
| 7909350                   | 1.7E-04 | -1.0208            | -2.2835 | -2.5744  | -2.2862  | -2.5478  |
| 7930927                   | 3.1E-04 | 1.0152             | 1.4537  | 1.3382   | 1.2873   | 1.8381   |
| 7951077                   | 9.6E-06 | 1.0247             | 1.6745  | 1.8100   | 1.3330   | 1.3423   |
| 7988581                   | 4.4E-04 | 1.0276             | 1.1814  | 1.1702   | 1.1542   | 1.3929   |
| 7908409                   | 7.1E-04 | 1.0323             | 1.1883  | 1.4319   | 1.4055   | 2.1068   |
| 7908614                   | 7.6E-07 | 1.0407             | 1.4709  | 1.3987   | 1.0743   | 1.0535   |
| 7927146                   | 4.6E-04 | 1.0640             | 1.4369  | 1.4719   | 1.0494   | 1.0874   |
| 8088820                   | 1.1E-03 | 1.0687             | 1.3088  | 1.3846   | 1.1836   | 1.4865   |
| 8040340                   | 3.2E-05 | 1.1019             | 1.4510  | 2.1477   | 2.7407   | 2.4759   |
| 8179263                   | 1.1E-05 | 1.1702             | 1.4956  | 1.8275   | 2.7438   | 1.8850   |
| 8177983                   | 1.2E-05 | 1.1734             | 1.4809  | 1.8229   | 2.7416   | 1.8893   |
| 7996954                   | 2.3E-05 | 1.1761             | 1.2036  | 1.2570   | 1.3251   | 1.4174   |
| 8118142                   | 1.1E-05 | 1.1815             | 1.4929  | 1.8318   | 2.7499   | 1.8965   |
| 8147344                   | 1.9E-08 | 1.1963             | 1.5263  | 1.7797   | 1.9956   | 2.1561   |
| 7915160                   | 8.9E-05 | 1.2059             | 1.3131  | 1.2327   | 1.2788   | 1.4119   |
| 7904018                   | 7.6E-05 | 1.2155             | 2.0938  | 2.0671   | 2.1181   | 1.8214   |
| 8024485                   | 5.6E-02 | 1.2196             | 1.2194  | 1.1745   | 1.5050   | 1.1696   |
| 7962884                   | 1.0E-02 | 1.2730             | 1.0901  | 1.4004   | 1.4768   | 1.7706   |
| 8166289                   | 8.9E-04 | 1.3350             | 1.4318  | 1.3612   | 1.3056   | 1.2537   |
| 8031047                   | 2.1E-03 | 1.3559             | 1.1944  | 1.0338   | 1.2570   | 1.4851   |
| 8052689                   | 3.1E-03 | 1.4091             | 1.3231  | 1.2464   | 1.4387   | 1.4678   |
| 7907160                   | 1.2E-05 | 1.5475             | 2.0191  | 2.3011   | 1.6774   | 1.8729   |
| 7906613                   | 6.3E-05 | 1.6275             | 2.4251  | 1.9345   | 1.9318   | 2.9300   |
| 8083569                   | 3.2E-05 | 1.6301             | 1.5426  | 1.5670   | 1.5690   | 1.5113   |
| 8116649                   | 1.4E-05 | 1.6857             | 2.8524  | 3.1246   | 3.0647   | 2.5039   |
| 8116653                   | 1.4E-05 | 1.6900             | 2.8487  | 3.1243   | 3.0666   | 2.5036   |
| 7933872                   | 2.5E-04 | 2.0475             | 2.0246  | 2.5526   | 3.5423   | 2.8864   |
| 7960865                   | 1.5E-05 | 2.1015             | 2.8649  | 3.2381   | 4.0654   | 4.0060   |
| 8015031                   | 1.1E-03 | 3.0579             | 3.5709  | 3.0130   | 2.8479   | 3.1962   |
| 8108370                   | 1.3E-06 | 3.6314             | 3.5677  | 3.6132   | 3.8088   | 2.9792   |
| 7927062                   | 1.9E-05 | -1.2275            | -1.3620 | -1.5099  | -1.0674  | -0.9927  |
| 8041168                   | 4.0E-02 | -1.0202            | -1.1212 | -1.0073  | -1.2688  | -0.6720  |
| 7953878                   | 1.6E-07 | -1.0930            | -2.2492 | -2.7129  | -1.7638  | -0.9400  |
| 7908125                   | 1.7E-04 | 1.3396             | 1.5180  | 1.3334   | 1.1425   | 0.8911   |
| 7918955                   | 9.2E-08 | 1.0480             | 1.4020  | 1.2554   | 1.0474   | 0.9836   |
| 8117106                   | 2.6E-08 | -1.1088            | -1.7253 | -1.9472  | -1.6856  | -1.9446  |
| 8100943                   | 7.7E-07 | -0.7896            | -2.1996 | -2.6043  | -2.6395  | -2.5490  |
| 8175393                   | 5.3E-07 | -0.3747            | -0.8577 | -1.3280  | -1.2895  | -2.2477  |
| 7982663                   | 6.1E-10 | -0.0854            | -0.5596 | -0.4801  | -1.6292  | -2.9746  |
| 8018860                   | 3.2E-07 | -0.6689            | -0.9257 | -0.7807  | -2.2421  | -3.2001  |
| 8078248                   | 2.0E-08 | -0.2464            | -0.4250 | -0.8206  | -1.3919  | -1.6425  |
| 8083941                   | 2.5E-10 | -0.0268            | -0.0519 | -0.1832  | -1.1355  | -1.9876  |
| 8014974                   | 3.9E-08 | -0.1200            | -0.1248 | -0.1948  | -0.9552  | -2.0126  |
| 8057744                   | 2.3E-09 | 0.5770             | 1.1830  | 1.7541   | 4.9104   | 4.8168   |
| 7944560                   | 2.4E-08 | 0.6334             | 1.5229  | 2.0268   | 2.2044   | 2.1930   |
| 8129677                   | 9.3E-07 | 0.8994             | 1.2333  | 1.2141   | 2.0323   | 2.3453   |
| 7965040                   | 1.1E-07 | 0.1908             | 0.7834  | 1.1813   | 1.9549   | 2.0961   |
| 8058295                   | 1.5E-06 | 0.1931             | 0.9557  | 1.0421   | 1.0998   | 1.0722   |
| 8004184                   | 3.7E-07 | 0.0716             | -0.1633 | 0.1002   | 3.5089   | 4.5170   |
| 7926239                   | 1.6E-06 | 0.0000             | 0.1916  | 0.5041   | 1.6559   | 2.0566   |
| 8051501                   | 7.8E-07 | 0.1352             | 0.2378  | 0.3089   | 1.7894   | 1.9253   |
| 8061579                   | 1.5E-09 | 0.0053             | -0.1161 | -0.2207  | -0.9256  | -1.8360  |
| 8014391                   | 1.7E-06 | -0.0370            | -0.1682 | 0.5560   | 2.7342   | 2.6611   |
| 8014414                   | 1.7E-06 | -0.0348            | -0.1665 | 0.5567   | 2.7352   | 2.6623   |
| 8019731                   | 1.7E-06 | -0.0367            | -0.1686 | 0.5562   | 2.7349   | 2.6616   |
| 8048940                   | 4.6E-07 | 0.4762             | 0.8810  | 0.9652   | 2.7610   | 2.6477   |
| 8094743                   | 3.2E-07 | -1.4982            | -2.2729 | -2.3872  | -1.1540  | -0.3131  |
| 7925257                   | 8.4E-07 | 0.4533             | 1.0860  | 1.2175   | 1.3674   | 1.8281   |

|         |         |         |         |         |         |         |
|---------|---------|---------|---------|---------|---------|---------|
| 7935270 | 5.4E-07 | -0.4626 | -1.8367 | -2.1661 | -2.1519 | -2.4368 |
| 8167185 | 1.5E-07 | 0.1246  | 0.8698  | 2.1489  | 4.7711  | 3.6999  |
| 7902541 | 2.5E-08 | 0.0208  | 0.0704  | -0.0347 | 4.3151  | 5.8758  |
| 7929438 | 1.6E-07 | 0.1358  | -0.1307 | -0.4583 | -1.4382 | -1.9724 |
| 7948656 | 1.4E-07 | 0.2203  | 0.6867  | 0.7639  | 1.5482  | 1.2536  |
| 8014391 | 1.7E-06 | -0.0370 | -0.1682 | 0.5560  | 2.7342  | 2.6611  |
| 8048940 | 4.6E-07 | 0.4762  | 0.8810  | 0.9652  | 2.7610  | 2.6477  |
| 8078248 | 2.0E-08 | -0.2464 | -0.4250 | -0.8206 | -1.3919 | -1.6425 |
| 8160559 | 7.8E-07 | 0.3502  | 0.2017  | 0.5550  | 4.5512  | 4.5115  |
| 8047419 | 9.4E-05 | 0.4994  | 0.5532  | 0.4628  | 1.2683  | 0.9513  |
| 8148317 | 5.2E-05 | -1.0751 | -1.1458 | -1.0459 | -0.6846 | -0.3767 |
| 8122202 | 2.6E-06 | -0.5721 | -1.2001 | -1.0681 | -1.6209 | -1.3945 |
| 7957759 | 1.1E-05 | 1.4381  | 1.4266  | 1.3408  | 0.6126  | 0.4537  |
| 7998978 | 6.5E-06 | 1.6112  | 1.5211  | 1.0900  | 0.8915  | 0.7052  |
| 7939738 | 1.3E-03 | -0.5987 | -1.0704 | -0.6623 | -1.0457 | -1.6239 |
| 8071768 | 1.1E-02 | -0.7561 | -1.3202 | -1.1868 | -1.1355 | -1.4359 |
| 8102362 | 1.0E-04 | -0.6179 | -1.1522 | -1.2796 | -1.1553 | -1.4037 |
| 8046488 | 4.2E-07 | -0.8482 | -1.1170 | -1.2454 | -1.4781 | -2.0935 |
| 8141395 | 1.0E-03 | -0.6054 | -1.0230 | -1.2083 | -1.7418 | -2.2386 |
| 8105111 | 6.4E-07 | -0.7561 | -1.4009 | -1.4345 | -1.2262 | -1.0881 |
| 8102560 | 5.3E-09 | -0.6326 | -1.0105 | -1.4780 | -2.4141 | -2.9416 |
| 7927710 | 3.3E-06 | -0.6579 | -1.0414 | -1.2905 | -2.0695 | -2.3778 |
| 7953333 | 9.1E-05 | -0.4264 | -1.2110 | -1.3532 | -1.4325 | -1.7086 |
| 8152133 | 5.0E-08 | -0.6149 | -1.0429 | -1.2498 | -1.4270 | -1.7042 |
| 8097657 | 3.2E-06 | -0.7701 | -1.4898 | -1.4043 | -1.4733 | -1.6915 |
| 8083000 | 2.3E-04 | -0.7048 | -1.4841 | -1.5934 | -1.4323 | -1.4975 |
| 7987405 | 1.1E-03 | -0.6739 | -1.1130 | -1.2172 | -1.0905 | -1.4739 |
| 8071768 | 1.1E-02 | -0.7561 | -1.3202 | -1.1868 | -1.1355 | -1.4359 |
| 7987165 | 1.1E-05 | -0.5586 | -1.3212 | -1.6631 | -1.2515 | -1.3582 |
| 8012257 | 2.5E-04 | -0.3209 | -1.0548 | -1.5501 | -1.2541 | -1.2732 |
| 8130185 | 2.2E-03 | -0.5732 | -1.2544 | -1.6972 | -1.4133 | -1.1080 |
| 8100943 | 7.7E-07 | -0.7896 | -2.1996 | -2.6043 | -2.6395 | -2.5490 |
| 7953218 | 6.9E-09 | -0.1282 | -0.6652 | -1.1388 | -2.2978 | -2.8934 |
| 8019842 | 1.8E-06 | -0.4108 | -0.9736 | -1.5348 | -2.4004 | -2.8411 |
| 7989647 | 1.2E-06 | -0.5421 | -0.6348 | -1.0929 | -2.4489 | -3.3447 |
| 7916727 | 1.6E-05 | -0.7448 | -0.8144 | -1.0525 | -1.6815 | -2.3720 |
| 7921637 | 3.1E-08 | -0.8731 | -1.9191 | -2.2623 | -2.0049 | -2.1046 |
| 8123819 | 3.5E-03 | -0.5122 | -0.7708 | -1.1236 | -1.0902 | -1.2413 |
| 8036525 | 2.7E-04 | -0.3360 | -0.7325 | -1.1346 | -1.2427 | -1.1127 |
| 7897561 | 9.6E-06 | -0.0470 | 0.8005  | 1.2882  | 1.7365  | 1.1904  |
| 8072876 | 2.9E-06 | -0.0404 | 0.2994  | 1.0236  | 3.0259  | 2.9024  |
| 8101126 | 2.3E-06 | 0.0634  | -1.3244 | -1.4286 | 3.9037  | 3.9387  |
| 7926368 | 7.4E-04 | 0.7245  | 1.4675  | 1.7079  | 2.0223  | 1.4529  |
| 7996022 | 1.1E-01 | 0.3144  | 1.1714  | 1.7169  | 2.2878  | 1.1461  |
| 8123609 | 9.3E-02 | 0.8245  | 1.2819  | 1.1952  | 1.3382  | 1.1472  |
| 7923453 | 1.9E-04 | 0.5649  | 1.0428  | 1.1688  | 1.6382  | 1.3068  |
| 7930413 | 3.7E-06 | 0.7292  | 1.0066  | 1.1215  | 1.5888  | 1.3924  |
| 8116559 | 1.1E-03 | 0.9232  | 1.4542  | 1.3360  | 1.8057  | 1.5229  |
| 8044919 | 2.2E-06 | 0.3288  | 1.1377  | 1.3967  | 1.7546  | 1.6271  |
| 7964460 | 1.5E-02 | 0.9288  | 1.1293  | 1.2847  | 2.1859  | 2.1261  |
| 8110569 | 2.1E-05 | 0.7429  | 1.7574  | 2.2124  | 2.6944  | 2.1557  |
| 8135069 | 5.7E-06 | 0.8109  | 1.9774  | 2.6069  | 3.1446  | 2.5471  |
| 7912145 | 5.4E-07 | 0.4058  | 1.4296  | 2.2460  | 3.7392  | 2.6622  |
| 8077376 | 3.7E-04 | 0.3261  | 0.7817  | 1.1708  | 1.2969  | 1.3849  |
| 7965040 | 1.1E-07 | 0.1908  | 0.7834  | 1.1813  | 1.9549  | 2.0961  |
| 7919095 | 1.7E-02 | 0.5472  | 0.7950  | 1.3635  | 1.3585  | 1.1819  |
| 8149733 | 3.1E-05 | 0.5844  | 0.7879  | 1.0616  | 1.4252  | 1.3752  |
| 7983969 | 6.4E-06 | -0.0818 | -0.1278 | -0.4203 | -1.6110 | -3.0430 |
| 7968563 | 2.2E-06 | -0.1887 | -0.3334 | -0.5442 | -1.7486 | -2.8154 |
| 7960340 | 2.2E-06 | -0.3346 | -0.5547 | -0.9081 | -1.7462 | -2.5179 |
| 7942527 | 6.6E-06 | -0.7878 | -0.8187 | -0.9609 | -1.6748 | -2.3180 |
| 8138489 | 2.5E-04 | -0.5877 | -0.8200 | -0.7526 | -1.6352 | -1.7467 |
| 8097356 | 8.0E-09 | -0.2087 | -0.4348 | -0.9856 | -2.0110 | -3.0093 |
| 7974404 | 1.9E-04 | -0.1351 | -0.2770 | -0.3828 | -1.1574 | -2.7052 |
| 7909708 | 3.0E-05 | -0.3078 | -0.6166 | -0.5842 | -1.4681 | -2.6783 |
| 8120838 | 1.1E-04 | -0.3693 | -0.3979 | -0.5638 | -1.3481 | -2.5169 |
| 7945014 | 8.4E-09 | -0.2863 | -0.5425 | -0.7455 | -1.5079 | -2.3527 |
| 7994109 | 2.3E-06 | -0.2800 | -0.6633 | -0.6049 | -1.1056 | -2.1957 |
| 7982792 | 3.3E-06 | -0.3081 | -0.6401 | -0.9347 | -1.5927 | -1.9324 |
| 8171381 | 5.8E-06 | -0.3928 | -0.0629 | -0.4779 | -1.1136 | -1.5555 |

|         |         |         |         |         |         |         |
|---------|---------|---------|---------|---------|---------|---------|
| 8063043 | 2.8E-04 | -0.1485 | -0.4331 | -0.6164 | -1.0519 | -1.5000 |
| 8029136 | 6.2E-02 | -0.2409 | -0.5663 | -0.7593 | -1.0778 | -1.4669 |
| 7978846 | 4.7E-04 | -0.4617 | -0.7168 | -0.9420 | -1.0728 | -1.4569 |
| 7905826 | 4.7E-05 | -0.1989 | -0.9011 | -0.7596 | -1.5847 | -1.3971 |
| 7904314 | 2.7E-03 | -0.4720 | -0.7221 | -0.8652 | -1.0632 | -1.2611 |
| 7913869 | 6.6E-05 | -0.2462 | -0.2837 | -0.4686 | -1.1504 | -1.2601 |
| 7914141 | 8.4E-05 | -0.6874 | -0.5029 | -0.8277 | -1.4739 | -1.2224 |
| 8160647 | 8.7E-03 | -0.0801 | -0.3196 | -0.5229 | -1.0897 | -1.1529 |
| 8020468 | 5.1E-06 | -0.4603 | -0.7175 | -0.7287 | -1.0698 | -1.0756 |
| 8035847 | 4.5E-03 | -0.3073 | -0.3577 | -0.9279 | -1.1483 | -1.0459 |
| 7938035 | 3.0E-05 | -0.3846 | -0.5040 | -0.7468 | 1.6783  | 2.0330  |
| 8118571 | 4.6E-04 | -0.7844 | -0.6670 | -0.4139 | 1.0334  | 1.0870  |
| 8179495 | 4.5E-04 | -0.7886 | -0.6745 | -0.4126 | 1.0275  | 1.1026  |
| 8178211 | 4.7E-04 | -0.7833 | -0.6738 | -0.4138 | 1.0326  | 1.1101  |
| 8073088 | 2.7E-06 | -0.2517 | -0.2827 | -0.2744 | 1.5398  | 1.4836  |
| 8006608 | 4.0E-05 | -0.4166 | -0.9899 | -0.7334 | 1.4491  | 1.6544  |
| 8040080 | 2.2E-04 | -0.1108 | -0.0303 | -0.0535 | 2.7034  | 4.2293  |
| 8101118 | 7.4E-03 | -0.1000 | -0.0470 | -0.0831 | 3.6285  | 4.4566  |
| 8137414 | 8.3E-05 | -0.4487 | -0.0904 | 0.2398  | 1.0235  | 1.1958  |
| 8048898 | 3.3E-06 | -0.1869 | -0.2439 | 0.1397  | 2.1292  | 2.5616  |
| 8014316 | 6.0E-04 | -0.0030 | -0.0580 | 0.3247  | 3.0167  | 4.1850  |
| 7982757 | 2.5E-04 | -0.0711 | 0.0243  | -0.1257 | -1.2739 | -2.0315 |
| 7902553 | 5.1E-08 | -0.0258 | 0.0434  | -0.0059 | 3.6807  | 4.8355  |
| 7914851 | 3.4E-05 | -0.1926 | 0.0850  | 0.0024  | -1.2289 | -1.8157 |
| 7973433 | 1.5E-01 | -0.0093 | 0.2999  | 0.9845  | 1.6366  | 2.2219  |
| 8091327 | 3.0E-05 | -0.0502 | 0.1542  | 0.0491  | 2.1661  | 2.4684  |
| 8081386 | 6.8E-05 | -0.0228 | 0.1523  | 0.2221  | 1.1597  | 1.3134  |
| 8101131 | 9.7E-03 | -0.1079 | 0.0206  | 0.2323  | 3.1879  | 3.8600  |
| 8148124 | 2.3E-09 | 0.0343  | -0.0835 | -0.6884 | -1.2661 | -1.9857 |
| 7929438 | 1.6E-07 | 0.1358  | -0.1307 | -0.4583 | -1.4382 | -1.9724 |
| 8086880 | 4.5E-04 | 0.2335  | -0.5099 | -0.7519 | -1.3873 | -1.6928 |
| 7985873 | 1.2E-05 | 0.2024  | 0.1896  | -0.1111 | -1.0797 | -1.4970 |
| 8092169 | 5.8E-03 | 0.1635  | -0.2166 | -0.3660 | 2.9506  | 3.1990  |
| 8177976 | 6.7E-05 | 0.3543  | -0.0101 | 0.4042  | 1.8946  | 1.3662  |
| 8178295 | 4.5E-02 | 0.0684  | -0.0687 | 0.1051  | 1.6729  | 2.3329  |
| 7953569 | 1.1E-03 | 0.2017  | -0.0378 | 0.3622  | 1.4918  | 1.5155  |
| 7920271 | 3.8E-04 | 0.0508  | -0.0175 | 0.2102  | 1.2349  | 1.5461  |
| 8014369 | 4.8E-06 | 0.0367  | -0.0488 | 0.6844  | 2.8586  | 2.8367  |
| 8118137 | 4.3E-05 | 0.2684  | 0.0420  | 0.4467  | 2.3565  | 1.8168  |
| 8179258 | 5.1E-05 | 0.2825  | 0.0656  | 0.3956  | 2.3719  | 2.0088  |
| 7903358 | 5.0E-03 | 0.1045  | 0.1254  | 0.2023  | 1.6297  | 1.5749  |
| 7922773 | 3.5E-05 | 0.1438  | 0.3096  | 0.4302  | 1.6123  | 1.6356  |
| 8116622 | 2.4E-04 | 0.0332  | 0.2748  | 0.5444  | 1.8443  | 1.7699  |
| 7978644 | 5.7E-04 | 0.6572  | 0.2889  | 0.4716  | 1.8995  | 1.7948  |
| 8115734 | 6.7E-04 | 0.6595  | 0.8401  | 0.9098  | 2.1513  | 1.2897  |
| 8154233 | 4.5E-02 | 0.6771  | 0.7004  | 0.6198  | 2.1822  | 1.7307  |
| 7964119 | 4.4E-05 | 0.0047  | 0.2892  | 0.4322  | 2.1291  | 1.9509  |
| 7999468 | 2.0E-03 | 0.4840  | 0.6380  | 0.6285  | 1.1480  | 1.0314  |
| 8066716 | 3.2E-03 | 0.0589  | 0.6935  | 0.6090  | 1.0152  | 1.0473  |
| 8163825 | 3.6E-03 | 0.1210  | 0.2844  | 0.3680  | 1.2282  | 1.0476  |
| 7931810 | 1.7E-02 | 0.6179  | 0.4469  | 0.5975  | 1.2260  | 1.0688  |
| 8173444 | 3.5E-05 | 0.1361  | 0.6713  | 0.6594  | 1.0618  | 1.0900  |
| 8163618 | 6.9E-03 | 0.0143  | 0.0071  | 0.2527  | 1.5253  | 1.1707  |
| 8111698 | 1.7E-05 | 0.3743  | 0.1784  | 0.2183  | 1.0595  | 1.1894  |
| 8073960 | 2.8E-06 | 0.6792  | 0.7168  | 0.8172  | 1.0011  | 1.1913  |
| 8047161 | 1.9E-03 | 0.4887  | 0.6874  | 0.9083  | 1.3071  | 1.2201  |
| 8040103 | 4.2E-03 | 0.9506  | 0.5167  | 0.5343  | 1.0992  | 1.2226  |
| 8099029 | 1.6E-04 | 0.1866  | 0.5576  | 0.6388  | 1.2549  | 1.2254  |
| 8162533 | 4.0E-06 | 0.6405  | 0.6591  | 0.7492  | 1.1070  | 1.4383  |
| 8016847 | 6.2E-05 | 0.5138  | 0.5693  | 0.4973  | 1.5193  | 1.4589  |
| 7961120 | 6.2E-04 | 0.1075  | 0.3364  | 0.2512  | 1.0602  | 1.4654  |
| 8143341 | 3.8E-03 | 0.1520  | 0.3638  | 0.7632  | 1.4274  | 1.5904  |
| 8010260 | 7.3E-05 | -0.4369 | -0.5994 | -0.5477 | -1.1931 | -1.1506 |
| 8102076 | 8.9E-04 | -0.1075 | 0.0088  | -0.0282 | -1.1754 | -2.3668 |
| 8111569 | 5.4E-01 | -0.0933 | -0.0602 | -0.1014 | 1.3025  | 1.6979  |
| 8125512 | 1.2E-03 | -0.0335 | -0.0644 | -0.0932 | 1.8937  | 1.7966  |
| 8178867 | 1.2E-03 | -0.0327 | -0.0613 | -0.0922 | 1.8954  | 1.7979  |
| 8180061 | 1.2E-03 | -0.0217 | -0.0481 | -0.0836 | 1.9030  | 1.8033  |
| 8046003 | 1.1E-04 | -0.5374 | -0.6312 | -0.8169 | 1.0170  | 1.8508  |
| 7971296 | 7.0E-06 | -0.2254 | -0.3446 | -0.5256 | 1.8982  | 2.0192  |

|         |         |         |         |         |         |         |
|---------|---------|---------|---------|---------|---------|---------|
| 7940775 | 1.9E-04 | -0.2085 | -0.1531 | -0.1280 | 1.5722  | 2.0983  |
| 8082100 | 2.0E-05 | -0.1200 | -0.1152 | -0.1459 | 1.2821  | 2.1934  |
| 7951309 | 5.8E-11 | -0.0232 | -0.0235 | -0.0085 | 1.0924  | 2.9775  |
| 8119198 | 8.5E-05 | -0.3189 | -0.1644 | 0.2226  | 1.2999  | 1.0369  |
| 8179034 | 2.2E-02 | -0.1698 | -0.0104 | 0.4040  | 1.0378  | 1.1037  |
| 7965060 | 2.4E-04 | -0.4008 | -0.0263 | 0.1993  | 1.3060  | 1.3033  |
| 7988563 | 3.5E-04 | -0.1252 | -0.0605 | 0.0352  | 1.1704  | 1.4071  |
| 8074606 | 1.2E-04 | -0.0551 | -0.1230 | 0.0565  | 1.5577  | 1.6978  |
| 8037205 | 6.4E-03 | -0.0712 | -0.0195 | 0.1247  | 1.0682  | 1.8249  |
| 7917532 | 2.3E-04 | -0.0987 | -0.0491 | 0.0881  | 2.0673  | 2.1699  |
| 8083743 | 3.0E-03 | -0.0019 | 0.1864  | 0.5856  | 2.5479  | 1.6525  |
| 7914127 | 3.9E-04 | -0.1029 | 0.0722  | 0.2357  | 2.1761  | 1.6958  |
| 7917576 | 1.1E-02 | -0.0211 | 0.0066  | 0.0914  | 2.8431  | 4.4275  |
| 7982358 | 5.0E-08 | 0.0347  | -0.0810 | -0.3445 | -1.4192 | -2.7213 |
| 8013671 | 4.2E-07 | 0.0464  | -0.0358 | -0.0492 | -1.4025 | -2.2332 |
| 8104912 | 4.4E-07 | 0.0354  | -0.1062 | -0.2882 | -1.3982 | -2.1453 |
| 8103932 | 1.3E-04 | 0.0204  | -0.0945 | -0.4171 | -1.0561 | -1.9539 |
| 7958031 | 1.9E-04 | 0.1743  | -0.1394 | -0.3473 | -1.0038 | -1.8529 |
| 8151101 | 7.4E-09 | 0.0937  | -0.0936 | -0.5343 | -1.5735 | -1.7343 |
| 8035838 | 1.0E-04 | 0.4494  | -0.1077 | -0.7194 | -1.6190 | -1.7113 |
| 8102389 | 2.4E-05 | 0.2472  | -0.2178 | -0.4182 | -1.0954 | -1.6266 |
| 8120165 | 2.1E-04 | 0.4004  | -0.1436 | -0.5620 | -1.2988 | -1.4357 |
| 8102371 | 1.7E-05 | 0.1130  | -0.1995 | -0.5059 | -1.0244 | -1.4182 |
| 7978776 | 2.5E-02 | 0.0459  | -0.5736 | -0.4709 | -1.1511 | -1.3870 |
| 7901867 | 1.4E-06 | 0.1495  | -0.3217 | -0.5716 | -1.1122 | -1.3128 |
| 8046804 | 1.4E-06 | 0.0192  | -0.3162 | -0.5070 | -1.0594 | -1.3042 |
| 8123137 | 4.7E-03 | 0.0103  | -0.1827 | -0.3822 | -1.1474 | -1.2023 |
| 8163525 | 3.5E-05 | 0.0549  | -0.5609 | -0.8025 | -1.0873 | -1.1718 |
| 8064976 | 2.0E-04 | 0.0344  | -0.1311 | -0.0897 | -1.1618 | -1.0675 |
| 7999718 | 2.6E-05 | 0.0289  | -0.3265 | -0.6793 | -1.0752 | -1.0248 |
| 8011826 | 3.4E-03 | 0.1168  | -0.2651 | -0.3068 | 1.0876  | 1.8939  |
| 7929047 | 1.6E-04 | 0.0036  | -0.1258 | -0.0003 | 3.7496  | 3.5451  |
| 8008784 | 1.2E-07 | 0.1242  | 0.0549  | -0.1821 | -1.4174 | -2.7367 |
| 7923189 | 2.1E-06 | 0.0967  | 0.0109  | -0.2010 | -1.1178 | -2.6361 |
| 7910997 | 1.2E-05 | 0.0775  | 0.0999  | -0.0224 | -1.8816 | -2.5930 |
| 7929258 | 4.0E-05 | 0.2811  | 0.1049  | -0.0788 | -1.0131 | -2.2810 |
| 8089372 | 1.9E-06 | 0.0145  | 0.0311  | -0.2547 | -1.5365 | -2.2742 |
| 8001133 | 6.7E-07 | 0.0734  | 0.1351  | -0.1002 | -1.3222 | -1.8874 |
| 8006187 | 1.2E-07 | 0.5923  | 0.2080  | -0.1707 | -1.2172 | -1.7817 |
| 7995354 | 3.4E-05 | 0.6465  | 0.1397  | -0.1939 | -1.0835 | -1.7375 |
| 7997381 | 1.1E-05 | 0.0939  | 0.0636  | -0.2518 | -1.2509 | -1.6512 |
| 8056285 | 4.9E-05 | 0.4528  | 0.1604  | -0.0770 | 1.8989  | 2.1223  |
| 7937020 | 5.9E-08 | 0.1690  | 0.1347  | 0.0963  | -1.0333 | -2.3606 |
| 7929334 | 1.8E-05 | 0.0927  | 0.0972  | 0.0529  | -1.1317 | -2.0828 |
| 8054702 | 6.8E-05 | 0.0860  | 0.2614  | 0.0286  | -1.1841 | -1.8107 |
| 8145418 | 5.1E-11 | 0.5089  | 0.3107  | 0.2824  | -1.0661 | -1.7816 |
| 8173506 | 5.8E-08 | 0.2024  | 0.2933  | 0.0503  | -1.0179 | -1.5038 |
| 7929072 | 9.1E-06 | 0.0809  | 0.1931  | 0.1831  | 2.0147  | 2.2350  |
| 7961075 | 6.1E-02 | 0.9506  | 0.5217  | 0.5811  | 2.1929  | 2.2412  |
| 8156688 | 2.9E-08 | 0.2838  | 0.9377  | 0.9840  | 2.4730  | 2.2851  |
| 8024527 | 6.7E-04 | 0.0677  | 0.1313  | 0.2998  | 1.3035  | 2.3039  |
| 8122986 | 2.0E-03 | 0.1504  | 0.3928  | 0.8283  | 2.2106  | 2.3182  |
| 7896817 | 8.3E-04 | 0.1083  | 0.1488  | 0.2863  | 2.1557  | 2.3315  |
| 7905067 | 8.6E-06 | 0.2485  | 0.5715  | 0.7220  | 1.5669  | 2.4948  |
| 7919627 | 9.0E-06 | 0.2480  | 0.5840  | 0.7385  | 1.5832  | 2.5203  |
| 8098259 | 2.2E-02 | 0.0160  | 0.0173  | 0.0168  | 1.0010  | 2.5385  |
| 8077441 | 2.6E-06 | 0.5846  | 0.4991  | 0.9215  | 2.1368  | 2.5774  |
| 8010454 | 2.6E-05 | 0.1457  | 0.1667  | 0.3398  | 2.9566  | 2.7676  |
| 8010426 | 1.1E-05 | 0.1156  | 0.1086  | 0.4583  | 3.0391  | 2.8513  |
| 7917516 | 1.0E-02 | 0.1576  | 0.1143  | 0.3142  | 2.2440  | 2.8773  |
| 8106354 | 5.0E-04 | -0.1735 | -0.1387 | 0.2568  | 1.2751  | 1.0889  |
| 8090018 | 7.0E-08 | -0.3819 | -0.5793 | -0.5672 | 2.2550  | 2.6734  |
| 8035304 | 5.0E-06 | -0.2576 | -0.0291 | -0.1040 | 1.3081  | 1.4479  |
| 8082075 | 1.9E-05 | -0.5318 | -0.6867 | -0.6275 | 1.7127  | 1.9197  |
| 8094259 | 2.6E-04 | -0.0310 | -0.2063 | -0.1479 | 1.1654  | 1.2485  |
| 8049540 | 5.6E-03 | 1.4532  | 1.1483  | 0.3686  | -0.0958 | -0.4480 |
| 8092541 | 2.6E-05 | -0.0521 | 0.1496  | 0.3392  | 1.0890  | 1.0720  |
| 8177725 | 2.0E-02 | -0.1750 | 0.0193  | 0.3903  | 1.0285  | 1.1426  |
| 8179041 | 3.1E-02 | -0.0981 | 0.0750  | 0.3855  | 1.0034  | 1.1470  |
| 8178489 | 3.2E-02 | -0.0368 | 0.0983  | 0.4024  | 1.0669  | 1.1708  |

|         |         |         |         |         |         |         |
|---------|---------|---------|---------|---------|---------|---------|
| 7961546 | 1.4E-02 | -0.0370 | 0.0855  | 0.2723  | 1.0097  | 1.2004  |
| 7927799 | 2.1E-05 | -0.4884 | 0.3632  | 0.4497  | 1.0421  | 1.2471  |
| 7967117 | 2.5E-02 | -0.0160 | 0.0062  | 0.0908  | 1.6632  | 1.2522  |
| 7943293 | 3.6E-05 | -0.3395 | 0.6692  | 0.9063  | 1.8450  | 1.2707  |
| 7946228 | 1.8E-03 | -0.0295 | 0.4341  | 0.6597  | 1.5913  | 1.2945  |
| 7995838 | 3.2E-02 | -0.0134 | 0.2064  | 0.2110  | 1.1172  | 1.3382  |
| 8117800 | 5.4E-02 | -0.0158 | 0.1317  | 0.5173  | 1.2687  | 1.3814  |
| 8127094 | 4.4E-04 | -0.0695 | 0.2242  | 0.4019  | 1.6286  | 1.4057  |
| 8073081 | 3.4E-05 | -0.0594 | 0.1985  | 0.0198  | 1.9055  | 1.6740  |
| 8100827 | 2.7E-05 | -0.2040 | -0.3024 | -0.7354 | -1.2457 | -2.7869 |
| 8039928 | 1.2E-05 | -0.6055 | -0.8819 | -0.9554 | -1.8224 | -2.7226 |
| 7904452 | 9.4E-06 | -0.5582 | -0.8841 | -0.9286 | -1.8077 | -2.7210 |
| 7909146 | 1.5E-05 | -0.5763 | -0.8754 | -0.9384 | -1.8355 | -2.7152 |
| 8129763 | 1.2E-06 | -0.2339 | -0.3514 | -0.7042 | -1.7385 | -2.6832 |
| 7971653 | 1.3E-04 | -0.2381 | -0.2537 | -0.3967 | -1.2156 | -2.6681 |
| 8003844 | 1.3E-05 | -0.3600 | -0.4704 | -0.9474 | -1.4564 | -1.9211 |
| 7971866 | 3.9E-06 | -0.2477 | -0.0444 | -0.0149 | -1.0296 | -1.8431 |
| 7982712 | 2.6E-05 | -0.6502 | -0.4994 | -0.6882 | -1.1738 | -1.8046 |
| 7991735 | 2.7E-02 | -0.6202 | -0.5451 | -0.5561 | -1.1131 | -1.7870 |
| 7917976 | 4.1E-05 | -0.0212 | -0.2955 | -0.4695 | -1.1107 | -1.7773 |
| 8096753 | 1.5E-04 | -0.4163 | -0.6062 | -0.9630 | -1.1427 | -1.7621 |
| 7979281 | 3.7E-04 | -0.3843 | -0.3458 | -0.3617 | -1.2299 | -1.7501 |
| 8112327 | 1.2E-07 | -0.0456 | -0.5212 | -0.9169 | -1.8829 | -1.7357 |
| 7926896 | 1.9E-07 | -0.0415 | -0.5148 | -0.8958 | -1.7974 | -1.6869 |
| 7914878 | 1.2E-04 | -0.5379 | -0.1464 | -0.2946 | -1.1531 | -1.6380 |
| 8056728 | 7.8E-07 | -0.2380 | -0.5520 | -0.5851 | -1.1446 | -1.5563 |
| 8008682 | 1.8E-04 | -0.4511 | -0.7633 | -0.9788 | -1.2090 | -1.5498 |
| 7898549 | 4.7E-04 | -0.4561 | -0.6096 | -0.9745 | -1.1283 | -1.4875 |
| 7953697 | 2.8E-04 | -0.0688 | -0.3126 | -0.6605 | -1.3303 | -1.4719 |
| 7986246 | 2.4E-03 | -0.3922 | -0.8498 | -0.6860 | -1.0240 | -1.4444 |
| 8121087 | 1.1E-04 | -0.3766 | -0.7350 | -0.7695 | -1.1302 | -1.3793 |
| 8131583 | 2.4E-03 | -0.1859 | -0.4828 | -0.8530 | -1.0182 | -1.3576 |
| 8111960 | 5.4E-04 | -0.7786 | -0.6019 | -0.9598 | -1.1178 | -1.3502 |
| 7922391 | 5.0E-05 | -0.4656 | -0.3035 | -0.6965 | -1.1288 | -1.3314 |
| 8001496 | 1.4E-05 | -0.3639 | -0.2321 | -0.4370 | -1.0059 | -1.3117 |
| 7914334 | 1.3E-02 | -0.2595 | -0.7539 | -0.4001 | -1.1587 | -1.2933 |
| 7982290 | 2.5E-03 | -0.1234 | -0.3807 | -0.4369 | -1.1979 | -1.2581 |
| 7965867 | 2.4E-05 | -0.4920 | -0.4520 | -0.4600 | -1.1052 | -1.2507 |
| 7971027 | 8.0E-04 | -0.5658 | -0.5749 | -0.7116 | -1.0431 | -1.2420 |
| 8021716 | 4.2E-05 | -0.7768 | -0.8705 | -0.8369 | -1.0102 | -1.2338 |
| 8042079 | 4.2E-04 | -0.5153 | -0.9295 | -0.8250 | -1.1534 | -1.2195 |
| 7951038 | 1.9E-04 | -0.7809 | -0.7045 | -0.8456 | -1.1151 | -1.2181 |
| 7938364 | 2.2E-01 | -0.1751 | -0.5614 | -0.8023 | -1.3184 | -1.2154 |
| 8124527 | 9.9E-02 | -0.4607 | -0.2879 | -0.7512 | -1.0810 | -1.2019 |
| 8171013 | 5.6E-05 | -0.5906 | -0.7253 | -0.8894 | -1.0229 | -1.1961 |
| 7926807 | 1.0E-02 | -0.4912 | -0.8482 | -0.9164 | -1.0535 | -1.1910 |
| 8061019 | 2.5E-06 | -0.4444 | -0.7413 | -0.9934 | -1.0951 | -1.1471 |
| 8099850 | 1.5E-05 | -0.0877 | -0.3858 | -0.8843 | -1.2378 | -1.1369 |
| 7948908 | 1.5E-02 | -0.6466 | -0.0922 | -0.3473 | -1.0193 | -1.1368 |
| 7936706 | 4.4E-08 | -0.1447 | -0.4535 | -0.5883 | -1.0644 | -1.1242 |
| 8053834 | 1.5E-01 | -0.3137 | -0.7970 | -0.6492 | -1.0584 | -1.1070 |
| 8100758 | 6.1E-02 | -0.0090 | -0.8180 | -0.8153 | -1.5822 | -1.0554 |
| 8052934 | 1.5E-03 | -0.2354 | -0.8174 | -0.8703 | -1.0168 | -1.0125 |
| 7942204 | 1.1E-04 | 0.1250  | 0.3919  | 0.7077  | 1.0288  | 1.0019  |
| 8123637 | 2.9E-04 | 0.0741  | 0.2129  | 0.4673  | 1.1229  | 1.0108  |
| 8059413 | 3.6E-02 | 0.5928  | 0.6970  | 0.7475  | 1.2598  | 1.0324  |
| 7918900 | 4.3E-03 | 0.1458  | 0.1229  | 0.3135  | 1.0029  | 1.0558  |
| 7910385 | 7.5E-06 | 0.0062  | 0.4080  | 0.4579  | 1.1692  | 1.0664  |
| 8047596 | 5.3E-03 | 0.1850  | 0.5887  | 0.8507  | 1.0161  | 1.0701  |
| 8038515 | 4.0E-06 | 0.0360  | 0.5690  | 0.7669  | 1.4747  | 1.0850  |
| 7915787 | 1.7E-04 | 0.0092  | 0.3278  | 0.7065  | 1.2739  | 1.1168  |
| 8114354 | 4.0E-03 | 0.0279  | 0.7146  | 0.7540  | 1.7013  | 1.1351  |
| 8166243 | 6.3E-04 | 0.0556  | 0.1232  | 0.4428  | 1.3533  | 1.1492  |
| 8066939 | 6.0E-03 | 0.6982  | 0.6704  | 0.6392  | 1.2155  | 1.1493  |
| 8029701 | 6.6E-06 | 0.2541  | 0.3101  | 0.6422  | 1.2233  | 1.1525  |
| 7899394 | 6.2E-06 | 0.3587  | 0.9023  | 0.7673  | 1.6621  | 1.1967  |
| 8001317 | 2.1E-05 | 0.1768  | 0.6070  | 0.6118  | 1.4722  | 1.2257  |
| 8097435 | 2.5E-02 | 0.5239  | 0.4680  | 0.3736  | 1.2228  | 1.2341  |
| 8048976 | 2.5E-04 | 0.3857  | 0.2919  | 0.3728  | 1.5283  | 1.2565  |
| 7925929 | 1.9E-04 | 0.0890  | 0.2769  | 0.5007  | 1.4334  | 1.2663  |

|         |         |         |         |         |         |         |
|---------|---------|---------|---------|---------|---------|---------|
| 8159265 | 1.1E-05 | 0.0672  | 0.0618  | 0.6080  | 1.5295  | 1.2800  |
| 8042283 | 1.4E-02 | 0.6610  | 0.7760  | 0.8784  | 1.1739  | 1.2924  |
| 8069178 | 2.1E-06 | 0.0389  | 0.3871  | 0.4912  | 1.1137  | 1.2967  |
| 8054611 | 2.6E-05 | 0.0380  | 0.8068  | 0.9542  | 1.3074  | 1.3531  |
| 8099912 | 4.8E-04 | 0.0779  | 0.6896  | 0.8525  | 1.0270  | 1.3675  |
| 7940160 | 2.2E-04 | 0.2420  | 0.3334  | 0.2993  | 1.2408  | 1.4247  |
| 8041197 | 7.8E-02 | 0.9283  | 0.3856  | 0.3912  | 1.0118  | 1.4353  |
| 8048926 | 4.2E-04 | 0.0558  | 0.5731  | 0.6710  | 1.9243  | 1.4392  |
| 7927964 | 3.5E-03 | 0.4660  | 0.8468  | 0.9895  | 1.1139  | 1.4681  |
| 7954711 | 2.5E-03 | 0.2215  | 0.2452  | 0.2074  | 1.0889  | 1.4780  |
| 8135033 | 3.2E-03 | 0.7477  | 0.0354  | 0.1040  | 1.4224  | 1.4797  |
| 8031573 | 8.7E-04 | 0.1282  | 0.3878  | 0.6907  | 1.1169  | 1.5076  |
| 8146921 | 3.4E-07 | 0.4490  | 0.1636  | 0.3034  | 1.1561  | 1.6225  |
| 8095376 | 3.8E-04 | 0.3422  | 0.7340  | 0.9213  | 2.1244  | 1.7340  |
| 8101304 | 5.8E-03 | 0.7822  | 0.3755  | 0.2034  | 1.4548  | 1.7777  |
| 8031570 | 5.7E-04 | 0.0586  | 0.4285  | 0.7770  | 1.4287  | 1.8421  |
| 8151816 | 7.8E-04 | 0.0539  | 0.2321  | 0.2568  | 1.0906  | 1.8561  |
| 8166469 | 8.8E-03 | 0.3193  | 0.7382  | 0.9669  | 1.8070  | 1.8652  |
| 7919584 | 3.0E-03 | 0.2228  | 0.5555  | 0.3637  | 1.0290  | 1.8918  |
| 8146550 | 2.6E-03 | 0.3112  | 1.2127  | 1.1562  | 1.0945  | 1.2608  |
| 7988767 | 7.4E-06 | -0.0268 | 0.7143  | 0.8373  | 1.7789  | 1.8999  |
| 7931353 | 2.1E-02 | 0.2226  | 0.3274  | 0.6267  | 1.6335  | 1.0803  |
| 7958884 | 2.7E-06 | 0.3436  | 0.1191  | 0.3611  | 3.0252  | 3.1611  |
| 7958913 | 8.3E-06 | -0.2923 | -0.5569 | -0.5205 | 2.3355  | 2.6608  |
| 7969114 | 5.1E-03 | -0.4356 | -0.7541 | -0.9952 | -1.1913 | -1.3022 |
| 7962375 | 2.4E-05 | 0.3797  | 0.4075  | 0.4989  | 1.6074  | 1.0696  |
| 8002303 | 1.6E-05 | -0.0728 | -0.0366 | 0.0168  | 1.0072  | 1.1728  |
| 8130499 | 1.1E-02 | 0.3400  | 0.7308  | 0.5968  | 1.1198  | 1.0837  |
| 8112841 | 6.9E-05 | 0.0000  | 0.5892  | 0.8374  | 1.8440  | 1.5370  |
| 8064522 | 7.6E-02 | -0.3826 | -0.5959 | -0.6937 | -1.0315 | -1.2642 |
| 8108301 | 5.7E-06 | -0.5331 | -0.4498 | -0.3772 | -1.7899 | -2.8452 |
| 8060997 | 9.8E-05 | -0.0888 | 0.1512  | 0.4298  | 1.4800  | 2.0497  |
| 8058390 | 5.9E-06 | 0.0985  | 0.4260  | 0.7463  | 1.0067  | 1.5974  |
| 8068697 | 3.6E-04 | 0.0496  | -0.0788 | 0.0266  | 2.1982  | 3.6459  |
| 8016858 | 4.7E-03 | -1.1003 | -1.0080 | -0.6962 | -0.4191 | -0.1438 |
| 7896748 | 3.1E-03 | 1.3044  | 1.0423  | -0.8509 | 0.7974  | 0.5274  |
| 7977592 | 2.2E-01 | 1.3815  | 1.4575  | 0.3419  | -0.0230 | 0.0351  |
| 7947040 | 1.4E-03 | 1.3844  | 1.2907  | 0.9290  | 0.7165  | 0.4774  |
| 7976571 | 3.7E-03 | 1.1213  | 1.1842  | 0.9609  | 0.7005  | 0.5469  |
| 7957043 | 2.9E-04 | 1.0857  | 1.0859  | 0.8264  | 0.7405  | 0.6782  |
| 7913558 | 7.6E-04 | 1.0704  | 1.1285  | 0.9369  | 0.8582  | 0.7065  |
| 7923905 | 2.7E-02 | 1.5843  | 1.0635  | 0.7788  | 0.8587  | 0.8422  |
| 8080911 | 4.8E-05 | 1.5139  | 1.1202  | 0.8856  | 0.7245  | 0.9360  |
| 8103563 | 3.1E-05 | -0.0069 | 0.0943  | -0.0054 | 2.4627  | 3.7499  |
| 8168146 | 2.5E-06 | -0.3069 | -0.2440 | 0.1810  | -1.1126 | -2.0326 |
| 8004184 | 3.7E-07 | 0.0716  | -0.1633 | 0.1002  | 3.5089  | 4.5170  |
| 8071212 | 2.2E-06 | -0.2806 | -0.4766 | -0.7164 | -1.5946 | -2.4280 |
| 7984364 | 1.9E-03 | 0.5789  | 0.4981  | 0.7018  | 1.2807  | 1.2142  |
| 8007071 | 6.2E-07 | 0.3963  | -0.0006 | -0.2723 | -1.3028 | -1.8880 |
| 8102643 | 1.1E-06 | -0.1041 | -0.5503 | -0.8983 | -1.8738 | -2.8147 |
| 8146357 | 9.1E-06 | -0.4412 | -0.6937 | -0.8911 | -1.7640 | -2.4013 |
| 8055426 | 9.1E-05 | -0.5240 | -0.5102 | -0.4988 | -1.3217 | -1.6694 |
| 7916167 | 1.4E-04 | -0.2458 | -0.2183 | -0.2729 | -1.1506 | -1.6705 |
| 8064844 | 7.4E-05 | 0.0286  | -0.2010 | -0.4219 | -1.1210 | -1.2408 |
| 8066136 | 6.4E-03 | -0.8546 | -0.6689 | -0.7521 | -1.1379 | -1.4413 |
| 7970317 | 1.9E-03 | -0.0470 | -0.3716 | -0.6134 | -0.7387 | -1.0060 |
| 7934026 | 4.6E-08 | -0.1630 | -0.5439 | -0.8065 | -2.2116 | -2.2377 |
| 7941214 | 6.5E-05 | -0.6032 | -0.5721 | -0.5146 | -1.0190 | -1.4186 |
| 8026051 | 4.3E-03 | -0.7803 | -0.9523 | -0.6567 | -1.0365 | -1.5802 |
| 7964701 | 1.3E-03 | 0.2845  | 0.8748  | 0.6638  | 1.0841  | 1.1320  |
| 7934920 | 3.2E-07 | -0.0923 | 0.1708  | 0.4507  | 1.6222  | 1.6626  |
| 8092348 | 8.0E-04 | 0.1012  | 0.1145  | 0.2986  | 1.5632  | 1.5010  |
| 7934196 | 6.0E-02 | 0.1825  | 0.5356  | 0.8706  | 1.3777  | 1.4714  |
| 8124901 | 2.2E-02 | 0.0120  | 0.1433  | 0.4407  | 1.0353  | 1.2217  |
| 8117890 | 4.1E-02 | 0.1295  | 0.2607  | 0.5110  | 1.5758  | 1.4737  |
| 8117760 | 5.8E-03 | 0.0510  | 0.1274  | 0.1902  | 1.0194  | 1.1088  |
| 8179019 | 1.0E-02 | 0.0445  | 0.0479  | 0.1830  | 1.0048  | 1.1082  |
| 8178884 | 1.1E-01 | 0.1474  | 0.4911  | 0.6551  | 1.0410  | 1.0016  |
| 8180022 | 1.8E-03 | 0.3382  | 0.6926  | 0.6013  | 1.2090  | 1.2350  |
| 8177732 | 7.9E-02 | 0.0258  | 0.0139  | 0.4592  | 1.2359  | 1.2794  |

|         |         |         |         |         |         |         |
|---------|---------|---------|---------|---------|---------|---------|
| 8180086 | 1.1E-01 | 0.1390  | 0.4889  | 0.6515  | 1.0350  | 1.0086  |
| 8178826 | 1.7E-03 | 0.3053  | 0.6709  | 0.5834  | 1.1825  | 1.2002  |
| 8141374 | 1.0E-02 | 0.1232  | 0.5073  | 0.9348  | 1.5623  | 1.2481  |
| 8179103 | 4.3E-02 | 0.0841  | 0.2387  | 0.5418  | 1.6101  | 1.5228  |
| 8177717 | 7.9E-03 | 0.0617  | 0.0833  | 0.2150  | 1.0911  | 1.1963  |
| 8125537 | 1.1E-01 | 0.1545  | 0.4783  | 0.6586  | 1.0147  | 1.0055  |
| 8115831 | 1.8E-03 | 0.2932  | 0.3240  | 0.5343  | 1.6569  | 1.6476  |
| 7924450 | 2.6E-05 | 0.9002  | 0.7846  | 0.8041  | 1.7533  | 2.1357  |
| 8066074 | 3.9E-05 | -0.5781 | -0.3099 | -0.4151 | -1.0328 | -1.3058 |
| 8130374 | 1.0E-02 | 0.1308  | -0.0060 | -0.5299 | -1.2727 | -1.4920 |
| 8019857 | 7.5E-04 | -0.2651 | -0.5331 | -0.7854 | -1.5386 | -2.4795 |
| 7906930 | 1.6E-05 | -0.2141 | -0.3995 | -0.4531 | -1.7089 | -2.9839 |
| 8149955 | 1.8E-08 | -0.1753 | -0.5444 | -0.8340 | -2.1571 | -3.1730 |
| 7957032 | 7.4E-04 | -0.7407 | -0.9995 | -0.9460 | -1.3001 | -1.1487 |
| 8132318 | 3.1E-04 | -0.1132 | 0.0490  | -0.0411 | -1.1734 | -1.9985 |
| 7923086 | 2.7E-06 | -0.1516 | -0.1876 | -0.2370 | -1.4607 | -2.7749 |
| 8012403 | 3.9E-03 | -0.5308 | -0.6330 | -0.4819 | -1.2707 | -1.8029 |
| 7960702 | 2.3E-03 | -0.4552 | -0.4807 | -0.6463 | -1.0427 | -1.2178 |
| 7900167 | 3.5E-05 | -0.1840 | -0.4535 | -0.5887 | -1.2035 | -1.7282 |
| 8069933 | 9.0E-04 | -0.1285 | -0.3911 | -0.2521 | -1.0361 | -1.1232 |
| 8152582 | 2.3E-04 | -0.3558 | -0.5897 | -0.9618 | -1.4343 | -1.7463 |
| 7979307 | 9.6E-07 | -0.3288 | -0.2820 | -0.2033 | -1.1771 | -2.9664 |
| 8157691 | 4.1E-05 | -0.0498 | -0.1881 | -0.4346 | -1.0929 | -1.3532 |
| 8017133 | 1.3E-04 | -0.3527 | -0.3822 | -0.6552 | -1.0127 | -1.6204 |
| 8079237 | 2.9E-06 | -0.1882 | -0.4511 | -0.7484 | -1.8029 | -2.5376 |
| 7984540 | 7.9E-07 | -0.0942 | -0.2144 | -0.1937 | -1.0971 | -1.9581 |
| 7959408 | 3.0E-03 | -0.3000 | -0.4003 | -0.5501 | -1.0530 | -1.7290 |
| 7952830 | 2.2E-05 | -0.1087 | -0.3502 | -0.3657 | -1.0462 | -1.7295 |
| 8144153 | 5.8E-09 | -0.1403 | -0.0939 | -0.5170 | -1.2100 | -2.2732 |
| 8085754 | 6.6E-07 | -0.0248 | 0.2489  | 0.0674  | -1.1690 | -2.4620 |
| 7982889 | 1.8E-08 | 0.2548  | 0.1575  | -0.0589 | -1.2559 | -2.0685 |
| 8156982 | 1.4E-09 | -0.0520 | -0.3390 | -0.5545 | -1.4307 | -2.2111 |
| 8058695 | 3.5E-04 | -0.3599 | -0.5526 | -0.8076 | -1.0609 | -1.4503 |
| 8017262 | 7.0E-05 | -0.4118 | -0.3423 | -0.4052 | -1.1479 | -1.8306 |
| 7986068 | 2.9E-03 | -0.1646 | 0.0626  | -0.0974 | -1.1276 | -1.4972 |
| 7985829 | 8.9E-09 | -0.3625 | -0.3675 | -0.6344 | -1.4034 | -2.7018 |
| 8085145 | 7.5E-06 | 0.4603  | 0.1479  | 0.0843  | -1.0598 | -1.9492 |
| 8144036 | 1.2E-03 | -0.5535 | -0.4652 | -0.6588 | -1.2317 | -1.2682 |
| 8106730 | 4.7E-03 | -0.4594 | -0.8369 | -0.9762 | -1.1779 | -1.0680 |
| 7968484 | 1.8E-04 | -0.9280 | -0.8714 | -0.8384 | -1.2187 | -1.6675 |
| 7909568 | 1.2E-05 | -0.0573 | -0.1336 | -0.3261 | -1.2614 | -2.2547 |
| 8072122 | 1.7E-05 | -0.1621 | -0.2966 | -0.8405 | -1.1333 | -1.5865 |
| 8103728 | 1.2E-03 | -0.2271 | -0.5307 | -0.7504 | -1.7965 | -1.7747 |
| 7924712 | 1.1E-04 | -0.5345 | -0.6695 | -0.8531 | -1.4472 | -1.7560 |
| 7926259 | 4.7E-06 | -0.3441 | -0.2507 | -0.2599 | -1.3426 | -2.4210 |
| 8098423 | 1.8E-05 | -0.2608 | -0.5257 | -0.8232 | -1.7429 | -2.3268 |
| 7901123 | 4.7E-05 | 0.1102  | -0.4236 | -0.7933 | -1.1210 | -1.0788 |
| 8089875 | 3.1E-06 | -0.0849 | -0.1933 | -0.1971 | -1.2247 | -1.8045 |
| 7937915 | 2.0E-10 | -0.1763 | -0.3782 | -0.6219 | -1.6157 | -2.7777 |
| 8104234 | 3.0E-06 | -0.4078 | -0.9077 | -0.8340 | -1.7628 | -2.2134 |
| 8130374 | 1.0E-02 | 0.1308  | -0.0060 | -0.5299 | -1.2727 | -1.4920 |
| 7962760 | 1.1E-04 | -0.1248 | -0.5159 | -0.7473 | -1.0162 | -1.0619 |
| 7974198 | 4.7E-04 | -0.4688 | -0.6057 | -0.8379 | -1.3481 | -1.7299 |
| 8152041 | 2.2E-03 | 0.5747  | 0.8132  | 0.7909  | 1.4089  | 1.0119  |
| 7946089 | 1.5E-07 | 0.0431  | 0.3702  | 0.6975  | 2.2034  | 2.1698  |
| 8142886 | 1.5E-03 | 0.4967  | 0.8286  | 0.9068  | 1.0467  | 1.1081  |
| 7923426 | 9.5E-04 | -0.6383 | -0.6027 | -0.5750 | -1.1674 | -1.8563 |
| 7906662 | 1.1E-04 | -0.2330 | -0.7572 | -0.7309 | -1.0635 | -1.4296 |
| 8027650 | 4.2E-08 | -0.1026 | -0.4997 | -0.8390 | -1.2871 | -1.5710 |
| 8152668 | 1.8E-03 | -0.0214 | -0.0589 | -0.2816 | -1.2722 | -1.4303 |
| 7950796 | 2.7E-02 | -0.7563 | -0.6377 | -0.5519 | -1.0165 | -1.0747 |
| 7961798 | 4.3E-05 | -0.4358 | -0.8279 | -0.9784 | -1.4132 | -1.2332 |
| 8112376 | 7.9E-06 | -0.5258 | -0.4809 | -0.9651 | -2.1300 | -2.7102 |
| 8013307 | 1.3E-02 | 0.6589  | 0.2439  | 0.6158  | 1.1262  | 1.1782  |
| 7917472 | 2.7E-03 | 1.0003  | 1.0580  | 0.9451  | 0.7083  | 0.4735  |
| 8127158 | 1.7E-05 | 0.0320  | 0.4846  | 0.9523  | 1.0951  | 1.0781  |
| 8151457 | 7.4E-05 | 0.7016  | 0.7766  | 0.9229  | 1.2678  | 1.6782  |
| 8110450 | 5.8E-05 | -0.1675 | -0.3450 | -0.5151 | -1.2152 | -1.0354 |
| 8129953 | 2.4E-03 | 0.4026  | 0.1840  | 0.3107  | 1.3068  | 1.2541  |
| 8114010 | 6.4E-03 | 0.2037  | 0.1738  | 0.0054  | 2.1864  | 1.4469  |



|         |         |         |         |         |         |         |
|---------|---------|---------|---------|---------|---------|---------|
| 8103911 | 2.4E-04 | -0.1213 | 0.1808  | 0.2233  | 2.1033  | 1.9650  |
| 7933877 | 3.9E-03 | 0.8112  | 0.8004  | 0.7984  | 1.1731  | 1.1122  |
| 8108954 | 1.8E-03 | -0.1685 | -0.6758 | -0.6186 | -1.1231 | -1.2604 |
| 7930537 | 4.4E-05 | 0.5812  | 0.3044  | 0.4163  | 1.0621  | 1.3844  |
| 8062766 | 1.2E-08 | -0.3066 | -0.4644 | -0.7299 | -1.7740 | -2.6791 |
| 8054664 | 7.5E-05 | -0.4800 | -0.7443 | -0.9636 | -1.3355 | -1.2449 |
| 8157941 | 3.1E-02 | 1.3691  | 1.1631  | 0.8526  | 0.4573  | 0.6201  |
| 8157947 | 5.1E-02 | 1.4207  | 1.2056  | 0.9166  | 0.5610  | 0.7859  |
| 8157945 | 6.8E-02 | 1.4150  | 1.0242  | 0.9144  | 0.5331  | 0.5156  |
| 8157933 | 4.1E-02 | 0.7177  | 0.7314  | 0.7902  | 1.1156  | 1.0955  |
| 8030831 | 1.7E-02 | 0.8193  | 0.5667  | 0.7619  | 1.0549  | 1.2091  |
| 8067113 | 2.3E-06 | 0.1460  | 0.4677  | 0.5355  | 1.3693  | 1.8346  |
| 7995258 | 1.2E-02 | 0.6665  | 0.6397  | 0.5497  | 1.0278  | 1.0093  |
| 8027348 | 4.1E-03 | -0.3937 | -0.1616 | -0.5273 | -1.5537 | -1.6085 |
| 8066905 | 5.4E-04 | 0.5286  | 0.5808  | 0.5522  | 1.7445  | 1.9012  |
| 8019772 | 4.0E-04 | -0.0902 | -0.6805 | -0.9232 | -1.2567 | -2.3212 |
| 7961208 | 1.2E-04 | -0.6146 | -0.7504 | -0.9677 | -1.2233 | -1.3297 |
| 8009761 | 2.3E-02 | -0.2883 | -0.4149 | -0.5282 | -1.0513 | -1.4765 |
| 8115886 | 2.7E-05 | -0.2327 | -0.5324 | -0.3537 | -1.0525 | -1.2836 |
| 8110408 | 7.2E-05 | -0.2003 | -0.5090 | -0.3519 | -1.0271 | -1.1953 |
| 8019731 | 1.7E-06 | -0.0367 | -0.1686 | 0.5562  | 2.7349  | 2.6616  |
| 7916316 | 9.4E-04 | -0.2000 | -0.6352 | -0.7649 | -1.0345 | -1.7974 |

**Table 2S. Genes persistently regulated over 48 hours in response to the treatment with maslinic acid**

| Transcripts Cluster Id | Log of fold-change |          |          |
|------------------------|--------------------|----------|----------|
|                        | 4 hours            | 12 hours | 48 hours |
| 7908041                | 1.2                | 0.1      | 1.1      |
| 7908614                | 1.4                | 1.0      | 1.1      |
| 7912145                | 2.2                | 0.4      | 2.7      |
| 7918955                | 1.3                | 1.0      | 1.0      |
| 7925257                | 1.2                | 0.5      | 1.8      |
| 7926239                | 0.5                | 0.0      | 2.1      |
| 7929065                | 0.2                | 0.0      | 5.5      |
| 7944560                | 2.0                | 0.6      | 2.2      |
| 7946089                | 0.7                | 0.0      | 2.2      |
| 7948656                | 0.8                | 0.2      | 1.3      |
| 7954559                | 1.3                | 0.5      | 0.9      |
| 7965040                | 1.2                | 0.2      | 2.1      |
| 7980958                | 1.4                | 0.4      | 1.4      |
| 7989335                | 3.3                | 0.3      | 3.6      |
| 7993126                | 1.4                | 0.2      | 1.1      |
| 8004184                | 0.1                | 0.1      | 4.5      |
| 8004510                | 1.4                | 0.5      | 2.8      |
| 8022531                | 2.4                | 0.7      | 1.6      |
| 8043480                | 1.3                | 0.4      | 1.8      |
| 8043484                | 1.3                | 0.4      | 1.7      |
| 8047538                | 1.4                | 0.9      | 1.6      |
| 8047854                | 1.0                | 0.9      | 0.7      |
| 8048940                | 1.0                | 0.5      | 2.6      |
| 8051501                | 0.3                | 0.1      | 1.9      |
| 8053735                | 1.4                | 0.4      | 1.9      |
| 8057744                | 1.8                | 0.6      | 4.8      |
| 8058295                | 1.0                | 0.2      | 1.1      |
| 8059650                | 1.3                | 0.5      | 3.0      |
| 8073062                | 1.5                | 0.2      | 3.7      |
| 8096301                | 2.3                | 0.1      | 2.8      |
| 8097098                | 1.4                | 0.4      | 1.6      |
| 8102619                | 0.8                | 0.2      | 0.8      |
| 8108370                | 3.6                | 3.6      | 3.0      |
| 8122464                | 1.6                | 0.2      | 2.2      |
| 8129573                | 0.1                | 0.0      | 1.0      |

|         |      |      |      |
|---------|------|------|------|
| 8129677 | 1.2  | 0.9  | 2.3  |
| 8134180 | 0.8  | 0.3  | 1.0  |
| 8140782 | 2.2  | 0.7  | 2.9  |
| 8142345 | 1.5  | 0.2  | 2.0  |
| 8146921 | 0.3  | 0.4  | 1.6  |
| 8147344 | 1.8  | 1.2  | 2.2  |
| 8154836 | 2.5  | 0.4  | 2.9  |
| 8156688 | 1.0  | 0.3  | 2.3  |
| 8160559 | 0.6  | 0.4  | 4.5  |
| 8161563 | 1.3  | 0.4  | 1.7  |
| 8161580 | 1.3  | 0.4  | 1.7  |
| 8167185 | 2.1  | 0.1  | 3.7  |
| 8169519 | 1.3  | 0.9  | 1.2  |
| 7899813 | -1.0 | -0.5 | -1.6 |
| 7907079 | -1.4 | -0.7 | -1.2 |
| 7921637 | -2.3 | -0.9 | -2.1 |
| 7926896 | -0.9 | 0.0  | -1.7 |
| 7933219 | -2.1 | -0.8 | -2.0 |
| 7934026 | -0.8 | -0.2 | -2.2 |
| 7935270 | -2.2 | -0.5 | -2.4 |
| 7936706 | -0.6 | -0.1 | -1.1 |
| 7937915 | -0.6 | -0.2 | -2.8 |
| 7945014 | -0.7 | -0.3 | -2.4 |
| 7953218 | -1.1 | -0.1 | -2.9 |
| 7953878 | -2.7 | -1.1 | -0.9 |
| 7957737 | -1.1 | -0.6 | -1.6 |
| 7959052 | -0.4 | -0.3 | -1.5 |
| 7961069 | -2.3 | -1.2 | -2.0 |
| 7979307 | -0.2 | -0.3 | -3.0 |
| 7982663 | -0.5 | -0.1 | -3.0 |
| 7984540 | -0.2 | -0.1 | -2.0 |
| 7985829 | -0.6 | -0.4 | -2.7 |
| 7988537 | -0.6 | -0.2 | -2.1 |
| 7989647 | -1.1 | -0.5 | -3.3 |
| 7989834 | -1.3 | -0.7 | -1.3 |
| 8014974 | -0.2 | -0.1 | -2.0 |
| 8018860 | -0.8 | -0.7 | -3.2 |
| 8027650 | -0.8 | -0.1 | -1.6 |
| 8046488 | -1.2 | -0.8 | -2.1 |
| 8052866 | -1.2 | -0.4 | -1.2 |
| 8056572 | -0.6 | -0.5 | -2.1 |
| 8056728 | -0.6 | -0.2 | -1.6 |
| 8062766 | -0.7 | -0.3 | -2.7 |
| 8067167 | -0.6 | -0.2 | -2.5 |
| 8074934 | -1.2 | -0.2 | -1.3 |
| 8077731 | -1.0 | -0.5 | -2.5 |
| 8078248 | -0.8 | -0.2 | -1.6 |
| 8083494 | -1.3 | -0.4 | -2.2 |
| 8083941 | -0.2 | 0.0  | -2.0 |
| 8088491 | -1.7 | -0.3 | -2.2 |
| 8089478 | -2.7 | -0.9 | -2.3 |
| 8094743 | -2.4 | -1.5 | -0.3 |
| 8095574 | -1.2 | -0.4 | -2.0 |
| 8097356 | -1.0 | -0.2 | -3.0 |
| 8100943 | -2.6 | -0.8 | -2.5 |
| 8101659 | -2.4 | -0.5 | -3.1 |
| 8102560 | -1.5 | -0.6 | -2.9 |
| 8102643 | -0.9 | -0.1 | -2.8 |
| 8105111 | -1.4 | -0.8 | -1.1 |
| 8105828 | -0.1 | -0.2 | -2.7 |
| 8112327 | -0.9 | 0.0  | -1.7 |
| 8112570 | -1.0 | -0.5 | -1.7 |
| 8117106 | -1.9 | -1.1 | -1.9 |
| 8124307 | -1.2 | -0.5 | -1.0 |
| 8128329 | -0.5 | -0.3 | -1.8 |
| 8129763 | -0.7 | -0.2 | -2.7 |
| 8144153 | -0.5 | -0.1 | -2.3 |
| 8149955 | -0.8 | -0.2 | -3.2 |
| 8152133 | -1.2 | -0.6 | -1.7 |
| 8156982 | -0.6 | -0.1 | -2.2 |

|         |      |      |      |
|---------|------|------|------|
| 8171896 | -1.1 | -1.0 | -0.8 |
| 8174051 | -1.7 | -0.7 | -1.7 |
| 8175177 | -1.5 | -0.4 | -1.7 |
| 8175393 | -1.3 | -0.4 | -2.2 |

**Table 3S. The expression level and the biological function of genes involved in the B-cell receptor signaling pathway**

| Entrez ID | Gene symbol | Gene name                                                  | Time interval (Hours) |      |      |      |      | Biological functions                       |
|-----------|-------------|------------------------------------------------------------|-----------------------|------|------|------|------|--------------------------------------------|
|           |             |                                                            | 4h                    | 8h   | 12h  | 24h  | 48h  |                                            |
| 605       | BCL7A       | B-cell CLL/lymphoma 7A                                     | -2.5                  | -3.0 | -2.8 | -2.2 | -2.3 | Negative regulation of transcription       |
| 1380      | CR2         | Complement component (3d/Epstein Barr virus) receptor 2    | -2.0                  | -4.9 | -6.0 | -4.9 | -5.8 | Complement activation, classical pathway   |
| 23421     | ITGB3BP     | integrin beta 3 binding protein (beta3-endonexin)          | -1.7                  | -1.8 | -2.1 | -3.2 | -5.2 | Membrane fraction                          |
| 29760     | BLNK        | B cell linker                                              | -1.4                  | -3.6 | -4.5 | -4.4 | -5.4 | B cell differentiation                     |
| 933       | CD22        | CD22 molecule                                              | -1.3                  | -1.9 | -2.3 | -2.1 | -1.6 | Protein binding                            |
| 3575      | IL7R        | Interleukin 7 receptor                                     | -2.0                  | -2.6 | -3.6 | -2.4 | -3.6 | B cell proliferation                       |
| 973       | CD79A       | CD79a molecule, immunoglobulin-associated alpha            | -1.2                  | -1.5 | -1.7 | -2.1 | -2.8 | B cell activation                          |
| 5341      | PLEK        | Pleckstrin                                                 | -1.3                  | -2.7 | -2.9 | 1.2  | 1.3  | Protein kinase C signaling cascade         |
| 5777      | PTPN6       | Protein tyrosine phosphatase, non-receptor type 6          | 1.2                   | -1.0 | 1.3  | 2.8  | 2.9  | Positive regulation of cell proliferation  |
| 5996      | RGS1        | Regulator of G-protein signaling 1                         | 1.4                   | 1.1  | 1.1  | 1.6  | 4.4  | GTPase activator activity                  |
| 7412      | VCAM1       | Vascular cell adhesion molecule                            | 1.1                   | 1.1  | 1.2  | 3.1  | 3.0  | Cell adhesion                              |
| 22822     | PHLDA1      | Pleckstrin homology-like domain, family A, member 1        | 1.1                   | 1.7  | 2.3  | 3.9  | 4.3  | Apoptosis                                  |
| 7431      | VIM         | Vimentin                                                   | 1.7                   | 2.8  | 3.3  | 4.1  | 2.7  | Protein kinase binding                     |
| 5997      | RGS2        | Regulator of G-protein signaling 2                         | 2.0                   | 2.3  | 2.7  | 2.6  | 4.3  | GTPase activator activity                  |
| 10725     | NFAT5       | Nuclear factor of activated T-cells 5, tonicity-responsive | 2.3                   | 2.3  | 2.4  | 2.5  | 2.7  | Regulation of transcription, DNA-dependent |
| 3665      | IRF7        | Interferon regulatory factor 7                             | 1.0                   | -1.1 | 1.1  | 1.0  | 1.2  | DNA binding                                |

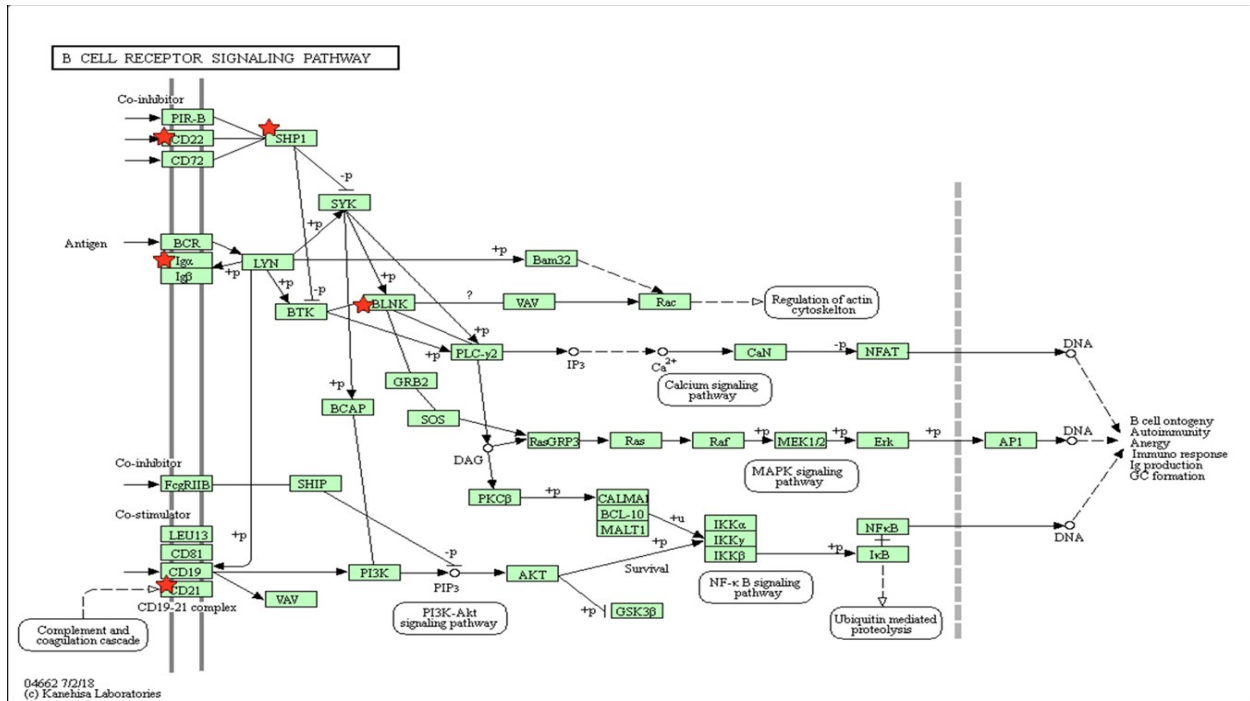

**Figure 1: Kyoto Encyclopedia of Genes and Genomes (KEGG) analysis of the B cell receptor signaling pathway.** The KEGG pathway analysis of genes identified by gene profiling arrays is shown. Highlighted by the red stars are genes that belong to this known B cell receptor signaling pathway that were also a part of the genes persistently regulated over 48 hours in response to the treatment with maslinic acid. Adapted from DAVID Bioinformatics Resources version 6.8 software.

**Table 4S: The expression level and the biological function of genes involved in the cell cycle and DNA replication events**

| Entrez ID | Gene symbol | Gene name                                            | Time interval (Hours) |      |      |      |      | Biological functions       |
|-----------|-------------|------------------------------------------------------|-----------------------|------|------|------|------|----------------------------|
|           |             |                                                      | 4h                    | 8h   | 12h  | 24h  | 48h  |                            |
| 7027      | TFDP1       | Transcription factor Dp-1                            | -1.0                  | -1.3 | -1.5 | -1.7 | -2.0 | Cell cycle                 |
| 7465      | WEE1        | WEE1 homolog (S. pombe)                              | -1.1                  | -1.5 | -1.7 | -2.5 | -2.3 | Cell cycle                 |
| 4609      | MYC         | v-mycmyelocytomatosis viral oncogene homolog (avian) | -2.1                  | -2.2 | -2.1 | -1.6 | -1.3 | Cell cycle arrest          |
| 5933      | RBL1        | Retinoblastoma-like 1 (p107)                         | -1.8                  | -1.6 | -1.7 | -2.2 | -2.7 | Cell cycle                 |
| 4602      | MYB         | v-mybmyeloblastosis viral oncogene homolog (avian)   | -1.5                  | -2.3 | -2.1 | -3.1 | -2.6 | DNA binding                |
| 4175      | MCM6        | Minichromosome maintenance complex component 6       | -1.4                  | -1.4 | -1.4 | -2.5 | -3.2 | DNA binding                |
| 55388     | MCM10       | Minichromosome maintenance complex component 10      | -1.3                  | -1.2 | -1.2 | -2.5 | -5.4 | Cell cycle arrest          |
| 983       | CDK1        | Cyclin-dependent kinase 1                            | -1.6                  | -2.1 | -2.4 | -4.2 | -5.2 | Cell cycle                 |
| 4085      | MAD2L1      | MAD2 mitotic arrest deficient-like 1 (yeast)         | -1.6                  | -2.0 | -2.8 | -5.3 | -7.7 | Cell cycle                 |
| 4176      | MCM7        | Minichromosome maintenance complex component 7       | -1.5                  | -2.0 | -2.3 | -3.3 | -4.7 | Cell cycle                 |
| 4173      | MCM4        | Minichromosome maintenance complex component 4       | -1.4                  | -1.6 | -1.9 | -3.4 | -5.3 | DNA replication checkpoint |
| 7272      | TTK         | TTK protein kinase                                   | -1.3                  | -1.3 | -1.5 | -2.5 | -5.7 | Cell proliferation         |
| 2305      | FOXM1       | Forkhead box M1                                      | -1.3                  | -1.5 | -1.9 | -3.4 | -5.7 | Cell cycle                 |
| 1063      | CENPF       | Centromere protein F                                 | -1.2                  | -1.5 | -1.5 | -2.8 | -6.4 | Mitotic cell cycle         |
| 8318      | CDC45       | Cell division cycle 45 homolog (S. cerevisiae)       | -1.2                  | -1.4 | -1.6 | -3.0 | -5.4 | Cell cycle                 |
| 5347      | PLK1        | Polo-like kinase 1                                   | -1.2                  | -1.6 | -1.5 | -2.2 | -4.6 | G2/M transition DNA        |

|        |          |                                                         |      |      |      |      |      |                                                   |
|--------|----------|---------------------------------------------------------|------|------|------|------|------|---------------------------------------------------|
| 4998   | ORC1     | Origin recognition complex, subunit 1                   | -1.2 | -1.2 | -1.2 | -2.2 | -3.2 | damage checkpoint<br>Origin recognition complex   |
| 1033   | CDKN3    | Cyclin-dependent kinase inhibitor 3                     | -1.1 | -1.2 | -1.3 | -2.2 | -6.5 | Cell cycle arrest                                 |
| 9133   | CCNB2    | Cyclin B2                                               | -1.1 | -1.1 | -1.3 | -3.1 | -8.2 | Cell cycle                                        |
| 890    | CCNA2    | Cyclin A2                                               | -1.1 | -1.5 | -1.9 | -3.7 | -7.0 | G2/M DNA damage checkpoint                        |
| 5111   | PCNA     | Proliferating cell nuclear antigen                      | 1.0  | -1.1 | -1.3 | -2.2 | -2.4 | DNA binding                                       |
| 993    | CDC25A   | Cell division cycle 25 homolog A (S. pombe)             | 1.2  | -1.4 | -1.7 | -2.6 | -3.2 | Cell cycle                                        |
| 990    | CDC6     | Cell division cycle 6 homolog (S. cerevisiae)           | 1.3  | -1.0 | -1.2 | -2.5 | -3.7 | DNA replication checkpoint                        |
| 6502   | SKP2     | S-phase kinase-associated protein 2 (p45)               | 1.0  | -1.1 | -1.2 | -2.6 | -4.4 | G1/S transition of mitotic cell cycle             |
| 1062   | CENPE    | Centromere protein E                                    | -1.1 | 1.0  | -1.0 | -2.3 | -5.2 | Mitotic metaphase                                 |
| 57082  | CASC5    | Cancer susceptibility candidate 5                       | -1.1 | 1.0  | -1.1 | -2.4 | -4.1 | Spindle assembly check point                      |
| 699    | BUB1     | Budding uninhibited by benzimidazoles 1 homolog (yeast) | -1.0 | -1.0 | 1.0  | -1.7 | -4.7 | Cell cycle                                        |
| 22974  | TPX2     | TPX2, microtubule-associated, homolog (Xenopus laevis)  | 1.0  | -1.1 | -1.2 | -1.9 | -3.6 | Cell cycle                                        |
| 9134   | CCNE2    | Cyclin E2                                               | 1.4  | 1.1  | -1.4 | -2.6 | -2.6 | Cell cycle checkpoint                             |
| 23594  | ORC6     | Origin recognition complex, subunit 6                   | 1.6  | 1.1  | -1.1 | -2.1 | -3.3 | Origin recognition complex                        |
| 157313 | CDCA2    | Cell division cycle associated 2                        | 1.4  | 1.2  | 1.2  | -2.1 | -3.4 | Cell cycle                                        |
| 4616   | GADD45B  | Growth arrest and DNA-damage-inducible, beta            | 2.3  | 2.3  | 2.3  | 2.8  | 2.2  | Cell cycle                                        |
| 4088   | SMAD3    | SMAD family member 3                                    | 1.5  | 1.4  | 1.6  | 2.4  | 2.3  | Cell cycle arrest                                 |
| 7298   | TYMS     | Thymidylatesynthetase                                   | -1.3 | -2.0 | -2.9 | -5.3 | -7.2 | DNA replication                                   |
| 83879  | CDCA7    | Cell division cycle associated 7                        | -1.8 | -2.2 | -2.4 | -2.8 | -4.3 | Cell proliferation                                |
| 10535  | RNASEH2A | ribonuclease H2, subunit A                              | -1.7 | -1.9 | -1.6 | -2.1 | -3.0 | DNA replication                                   |
| 6118   | RPA2     | Replication protein A2                                  | -1.6 | -1.4 | -1.8 | -2.8 | -2.3 | DNA replication                                   |
| 23649  | POLA2    | Polymerase (DNA directed), alpha 2 (70kD subunit)       | -1.5 | -1.5 | -1.4 | -2.0 | -2.7 | DNA binding                                       |
| 5026   | P2RX5    | Purinergic receptor P2X, ligand-gated ion channel, 5    | -1.3 | -2.3 | -2.7 | -3.4 | -3.5 | Positive regulation of calcium-mediated signaling |
| 1163   | CKS1B    | CDC28 protein kinase regulatory subunit 1B              | -1.1 | -1.9 | -1.7 | -3.0 | -2.6 | Cell proliferation                                |
| 1763   | DNA2     | DNA replication helicase 2 homolog (yeast)              | -1.1 | -1.5 | -1.7 | -4.6 | -4.7 | Helicase activity                                 |
| 10733  | PLK4     | Polo-like kinase 4                                      | -1.2 | -1.4 | -2.0 | -4.0 | -8.1 | Positive regulation of centriole replication      |
| 56924  | PAK6     | p21 protein (Cdc42/Rac)-activated kinase 6              | -1.1 | -1.5 | -1.4 | -3.1 | -7.9 | Cell proliferation                                |
| 54107  | POLE3    | polymerase (DNA directed), epsilon 3 (p17 subunit)      | 1.0  | -1.5 | -1.7 | -2.1 | -2.3 | DNA replication                                   |
| 51667  | NUB1     | Negative regulator of ubiquitin-like proteins 1         | -1.4 | -1.1 | 1.2  | 2.0  | 2.3  | Protein ubiquitination                            |
| 9966   | TNFSF15  | TNF ligand                                              | 1.0  | 1.0  | 1.2  | 2.9  | 2.3  | Tumor necrosis factor receptor binding            |
| 9516   | LITAF    | Lipopolysaccharide-induced TNF factor                   | 1.4  | 1.6  | 1.5  | 2.2  | 2.0  | Apoptosis                                         |
| 3638   | INSIG1   | Insulin induced gene 1                                  | 1.9  | 2.3  | 2.7  | 2.8  | 1.8  | Cell proliferation                                |
| 3662   | IRF4     | Interferon regulatory factor 4                          | 1.9  | 2.7  | 2.5  | 3.5  | 2.9  | Regulation of transcription, DNA-dependent        |

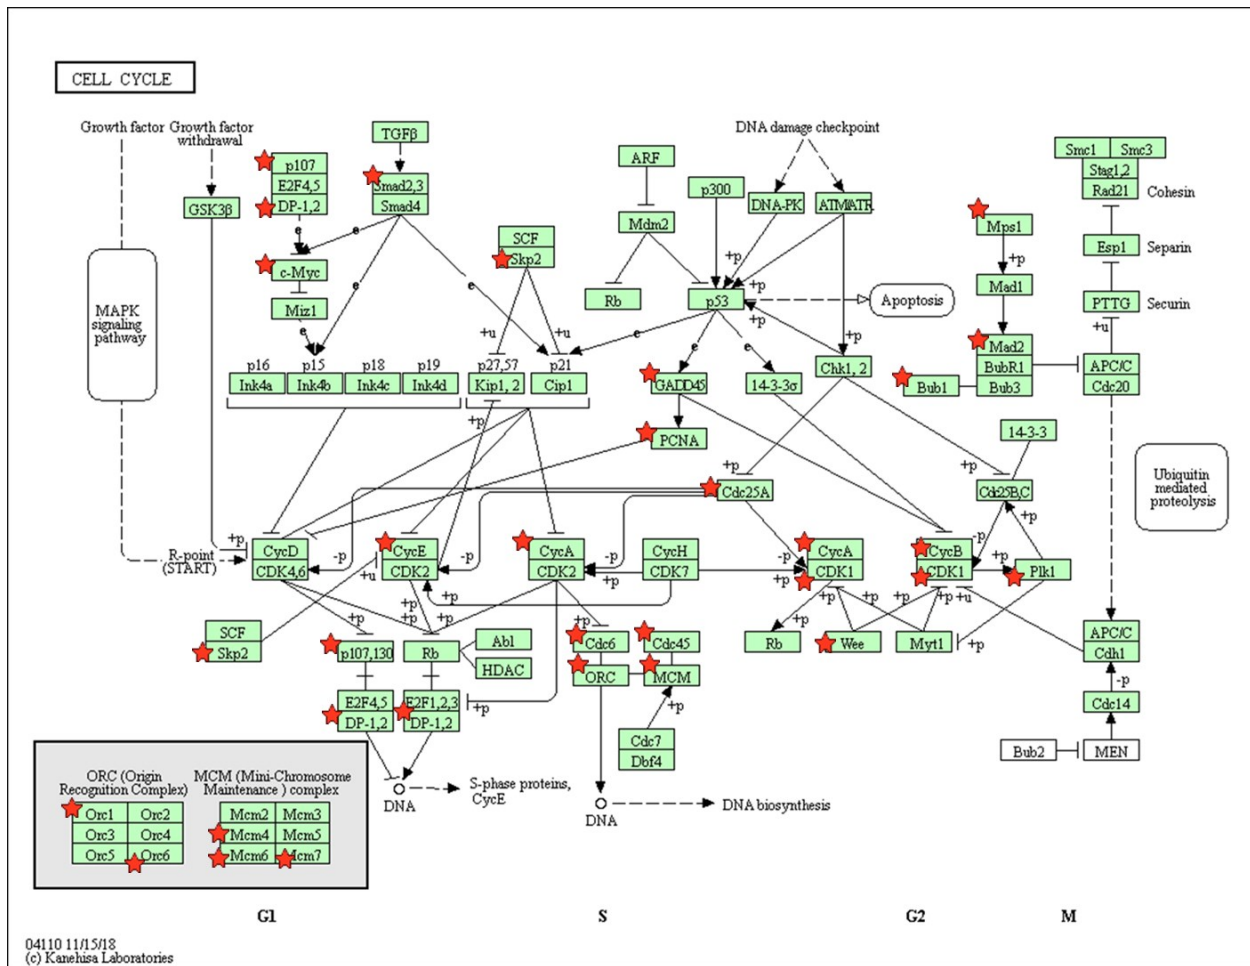

**Figure 2: Kyoto Encyclopedia of Genes and Genomes (KEGG) analysis of the cell cycle pathway.** The KEGG pathway analysis of genes identified by gene profiling arrays is shown. Highlighted by the red stars are genes that belong to this known cell cycle pathway that were also a part of the genes persistently regulated over 48 hours in response to the treatment with maslinic acid. Adapted from DAVID Bioinformatics Resources version 6.8 software.

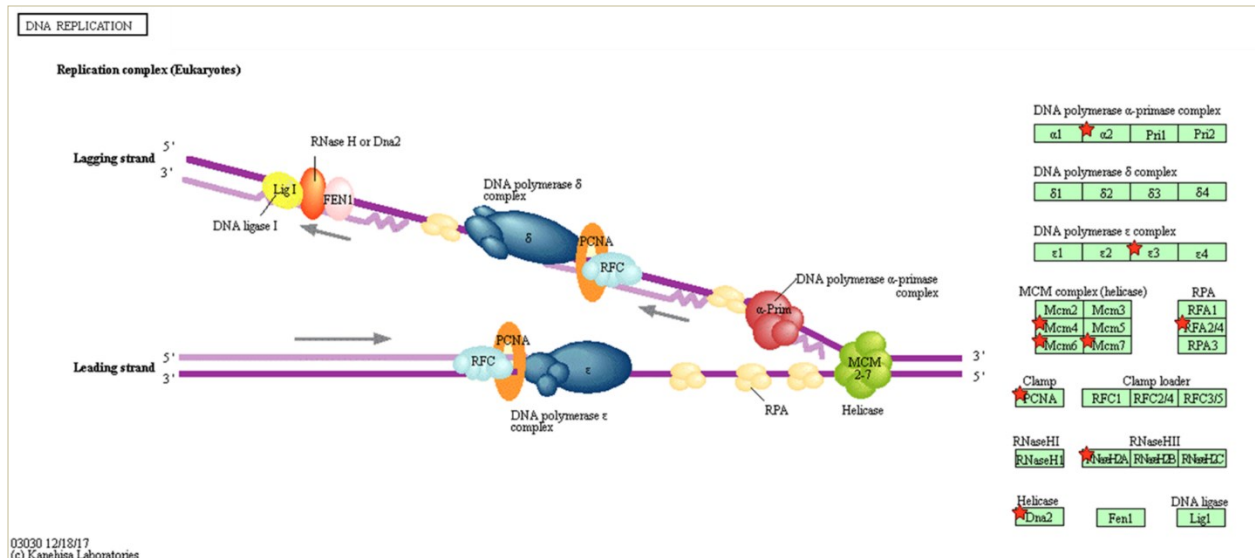

**Figure 3: Kyoto Encyclopedia of Genes and Genomes (KEGG) analysis of the DNA replication pathway.** The KEGG pathway analysis of genes identified by gene profiling arrays is shown. Highlighted by the red stars are genes that belong to this known DNA replication pathway that were also a part of the genes persistently regulated over 48 hours in response to the treatment with maslinic acid. Adapted from DAVID Bioinformatics Resources version 6.8 software.

**Table 5S: The expression level and the biological functions of genes involved in the MHC1 antigen presentation and processing pathway**

| Entrez ID | Gene symbol | Gene name                                                   | Time interval (Hours) |      |      |      |      | Biological functions                                   |
|-----------|-------------|-------------------------------------------------------------|-----------------------|------|------|------|------|--------------------------------------------------------|
|           |             |                                                             | 4h                    | 8h   | 12h  | 24h  | 48h  |                                                        |
| 4033      | LRMP        | Lymphoid-restricted membrane protein                        | -1.3                  | -3.6 | -4.9 | -3.6 | -2.5 | Endoplasmic reticulum                                  |
| 3105      | HLA-A       | Major histocompatibility complex, class I, A                | -1.1                  | 1.1  | 1.3  | 2.0  | 2.2  | MHC class I receptor activity                          |
| 3106      | HLA-B       | Major histocompatibility complex, class I, B                | -1.0                  | 1.1  | 1.4  | 2.4  | 2.6  | MHC class I receptor activity                          |
| 3107      | HLA-C       | Major histocompatibility complex, class I, C                | -1.0                  | 1.1  | 1.3  | 2.1  | 2.3  | MHC class I receptor activity                          |
| 3135      | HLA-G       | Major histocompatibility complex, class I, G                | -1.1                  | 1.0  | 1.3  | 2.0  | 2.2  | MHC class I receptor activity                          |
| 5698      | PSMB9       | Proteasome                                                  | -1.7                  | -1.6 | -1.3 | 2.0  | 2.1  | Proteasome complex                                     |
| 6890      | TAP1        | Transporter 1, ATP-binding cassette, sub-family B (MDR/TAP) | -1.0                  | -1.0 | -1.1 | 3.7  | 3.5  | Intracellular transport of viral proteins in host cell |
| 10537     | UBD         | Ubiquitin D                                                 | 1.0                   | -1.0 | 1.1  | 3.2  | 5.0  | Protein ubiquitination                                 |
| 3134      | HLA-F       | Major histocompatibility complex, class I, F                | 1.0                   | 1.1  | 1.1  | 2.0  | 2.2  | MHC class I receptor activity                          |
| 3133      | HLA-E       | Major histocompatibility complex, class I, E                | 1.1                   | 1.2  | 1.4  | 3.0  | 2.8  | MHC class I receptor activity                          |

|      |          |                                                       |     |     |     |     |     |                                                |
|------|----------|-------------------------------------------------------|-----|-----|-----|-----|-----|------------------------------------------------|
| 3108 | HLA-DMA  | Major histocompatibility complex, class II, DM alpha  | 1.1 | 1.4 | 1.6 | 2.0 | 2.0 | MHC class II protein complex                   |
| 3119 | HLA-DQB1 | Major histocompatibility complex, class II, DQ beta 1 | 1.2 | 1.6 | 1.5 | 2.3 | 2.3 | Antigen processing and presentation of peptide |
| 334  | APLP2    | Amyloid beta (A4) precursor-like protein 2            | 1.4 | 2.0 | 2.8 | 2.4 | 1.7 | Serine-type endopeptidase inhibitor activity   |

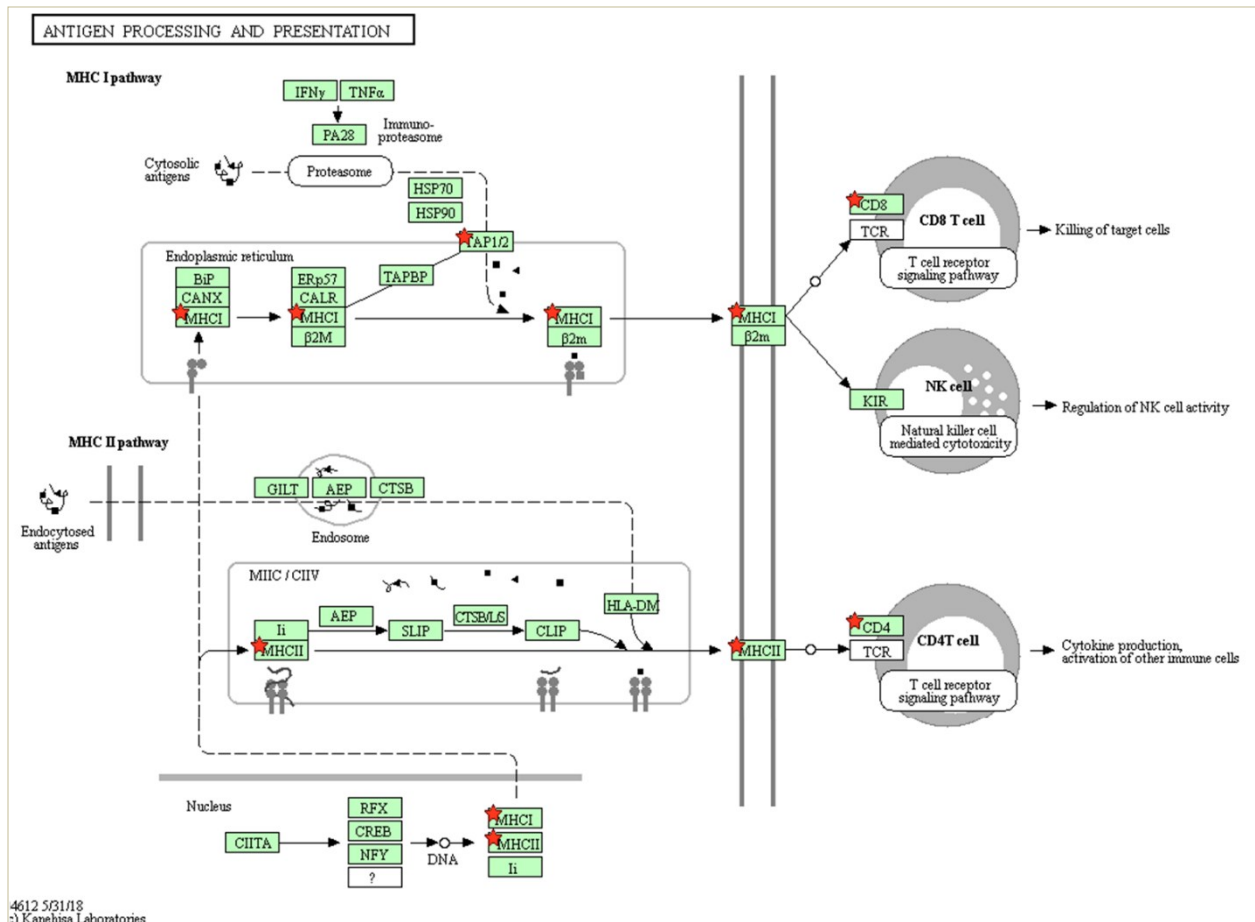

**Figure 4: Kyoto Encyclopedia of Genes and Genomes (KEGG) analysis of the MHC1 antigen presentation and processing pathway.** The KEGG pathway analysis of genes identified by gene profiling arrays is shown. Highlighted by the red stars are genes that belong to this known MHC1 antigen presentation and processing pathway that were also a part of the genes persistently regulated over 48 hours in response to the treatment with maslinic acid. Adapted from DAVID Bioinformatics Resources version 6.8 software.



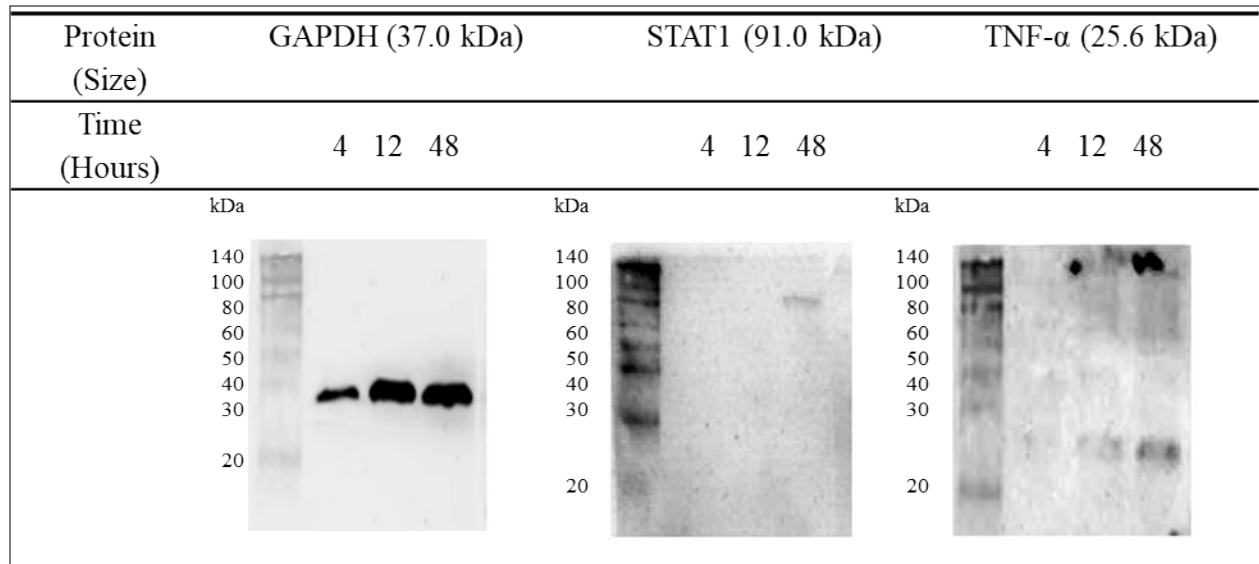

**Figure 5: Western blot assay on key regulatory proteins STAT1 and TNF- $\alpha$**

**Table 6S: Genes regulated by maslinic acid**

| Entrez ID | Gene name                                               | Gene symbol     | Time-point (H) |   |    |    |    | Biological functions                                     |
|-----------|---------------------------------------------------------|-----------------|----------------|---|----|----|----|----------------------------------------------------------|
|           |                                                         |                 | 4              | 8 | 12 | 24 | 48 |                                                          |
| 11184     | Mitogen-activated protein kinase kinasekinasekinase 1   | <i>MAP4K1</i>   |                |   |    |    |    | Activation of MAPKKK activity                            |
| 573       | BCL2-associated athanogene                              | <i>BAG1</i>     |                |   |    |    |    | Anti-apoptosis                                           |
| 55197     | Fas apoptotic inhibitory molecule                       | <i>FAIM</i>     |                |   |    |    |    | Apoptosis                                                |
| 973       | CD79a molecule, immunoglobulin-associated alpha         | <i>CD79A</i>    |                |   |    |    |    | B-cell activation                                        |
| 931       | Membrane-spanning 4-domains, subfamily A, member 1      | <i>MS4A1</i>    |                |   |    |    |    | B-cell activation                                        |
| 29760     | B cell linker                                           | <i>BLNK</i>     |                |   |    |    |    | B cell differentiation                                   |
| 332       | Baculoviral IAP repeat-containing 5                     | <i>BIRC5</i>    |                |   |    |    |    | Cell apoptosis activity                                  |
| 983       | Cyclin-dependent kinase 1                               | <i>CDK1</i>     |                |   |    |    |    | Cell cycle                                               |
| 4085      | MAD2 mitotic arrest deficient-like 1 (yeast)            | <i>MAD2L1</i>   |                |   |    |    |    | Cell cycle                                               |
| 4176      | Minichromosome maintenance complex component 7          | <i>MCM7</i>     |                |   |    |    |    | Cell cycle                                               |
| 5933      | Retinoblastoma-like 1 (p107)                            | <i>RBL1</i>     |                |   |    |    |    | Cell cycle                                               |
| 2305      | Forkhead box M1                                         | <i>FOXM1</i>    |                |   |    |    |    | Cell cycle                                               |
| 8318      | Cell division cycle 45 homolog (S. cerevisiae)          | <i>CDC45</i>    |                |   |    |    |    | Cell cycle                                               |
| 9133      | Cyclin B2                                               | <i>CCNB2</i>    |                |   |    |    |    | Cell cycle                                               |
| 7027      | Transcription factor Dp-1                               | <i>TFDP1</i>    |                |   |    |    |    | Cell cycle                                               |
| 7465      | WEE1 homolog (S. pombe)                                 | <i>WEE1</i>     |                |   |    |    |    | Cell cycle                                               |
| 4609      | v-mycmyelocytomatosis viral oncogene homolog (avian)    | <i>MYC</i>      |                |   |    |    |    | Cell cycle arrest                                        |
| 55388     | Minichromosome maintenance complex component 10         | <i>MCM10</i>    |                |   |    |    |    | Cell cycle arrest                                        |
| 1033      | Cyclin-dependent kinase inhibitor 3                     | <i>CDKN3</i>    |                |   |    |    |    | Cell cycle arrest                                        |
| 83879     | Cell division cycle associated 7                        | <i>CDC47</i>    |                |   |    |    |    | Cell proliferation                                       |
| 7272      | TTK protein kinase                                      | <i>TTK</i>      |                |   |    |    |    | Cell proliferation                                       |
| 56924     | p21 protein (Cdc42/Rac)-activated kinase 6              | <i>PAK6</i>     |                |   |    |    |    | Cell proliferation                                       |
| 1163      | CDC28 protein kinase regulatory subunit 1B              | <i>CKS1B</i>    |                |   |    |    |    | Cell proliferation                                       |
| 1380      | Complement component (3d/Epstein Barr virus) receptor 2 | <i>CR2</i>      |                |   |    |    |    | Complement activation, classical pathway                 |
| 23649     | Polymerase (DNA directed), alpha 2 (70kD subunit)       | <i>POLA2</i>    |                |   |    |    |    | DNA binding                                              |
| 4175      | Minichromosome maintenance complex component 6          | <i>MCM6</i>     |                |   |    |    |    | DNA binding                                              |
| 4602      | v-mybmyeloblastosis viral oncogene homolog (avian)      | <i>MYB</i>      |                |   |    |    |    | DNA binding                                              |
| 5983      | Replication factor C (activator 1) 3                    | <i>RFC3</i>     |                |   |    |    |    | DNA clamp loader activity                                |
| 1111      | CHK1 checkpoint homolog (S. pombe)                      | <i>CHEK1</i>    |                |   |    |    |    | DNA damage checkpoint                                    |
| 1643      | Damage-specific DNA binding protein 2                   | <i>DDB2</i>     |                |   |    |    |    | DNA repair                                               |
| 5932      | Retinoblastoma binding protein 8                        | <i>RBBP8</i>    |                |   |    |    |    | DNA repair                                               |
| 50484     | Ribonucleotidoreductase M2 B (TP53 inducible)           | <i>RRM2B</i>    |                |   |    |    |    | DNA repair                                               |
| 6118      | Replication protein A2                                  | <i>RPA2</i>     |                |   |    |    |    | DNA replication                                          |
| 10535     | Ribonuclease H2, subunit A                              | <i>RNASEH2A</i> |                |   |    |    |    | DNA replication                                          |
| 7298      | Thymidylatesynthetase                                   | <i>TYMS</i>     |                |   |    |    |    | DNA replication                                          |
| 4173      | Minichromosome maintenance complex component 4          | <i>MCM4</i>     |                |   |    |    |    | DNA replication checkpoint                               |
| 10714     | Polymerase (DNA-directed), delta 3, accessory subunit   | <i>POLD3</i>    |                |   |    |    |    | DNA-directed DNA polymerase activity                     |
| 5427      | Polymerase (DNA directed), epsilon 2 (p59 subunit)      | <i>POLE2</i>    |                |   |    |    |    | DNA-directed DNA polymerase activity                     |
| 4033      | Lymphoid-restricted membrane protein                    | <i>LRMP</i>     |                |   |    |    |    | Endoplasmic reticulum                                    |
| 5347      | Polo-like kinase 1                                      | <i>PLK1</i>     |                |   |    |    |    | G2/M transition DNA damage checkpoint                    |
| 1763      | DNA replication helicase 2 homolog (yeast)              | <i>DNA2</i>     |                |   |    |    |    | Helicase activity                                        |
| 355       | Fas (TNF receptor superfamily, member 6)                | <i>FAS</i>      |                |   |    |    |    | Induction of apoptosis by extracellular signals          |
| 171392    | Zinc finger protein 675                                 | <i>ZNF675</i>   |                |   |    |    |    | I-kappaB kinase/NF-kappaB cascade                        |
| 23421     | Integrin beta 3 binding protein (beta3-endonexin)       | <i>ITGB3BP</i>  |                |   |    |    |    | Membrane fraction                                        |
| 1063      | Centromere protein F                                    | <i>CENPF</i>    |                |   |    |    |    | Mitotic cell cycle                                       |
| 890       | Cyclin A2                                               | <i>CCNA2</i>    |                |   |    |    |    | Mitotic cell cycle G2/M transition DNA damage checkpoint |
| 605       | B-cell CLL/lymphoma 7A                                  | <i>BCL7A</i>    |                |   |    |    |    | Negative regulation of transcription                     |
| 4998      | Origin recognition complex, subunit 1                   | <i>ORC1</i>     |                |   |    |    |    | Origin recognition complex                               |
| 7157      | Tumor protein p53                                       | <i>TP53</i>     |                |   |    |    |    | p53 binding                                              |

|        |                                                                                     |                  |  |                                                           |
|--------|-------------------------------------------------------------------------------------|------------------|--|-----------------------------------------------------------|
| 5026   | Purinergic receptor P2X, ligand-gated ion channel, 5                                | <i>P2RX5</i>     |  | Positive regulation of calcium-mediated signaling         |
| 10733  | Polo-like kinase 4                                                                  | <i>PLK4</i>      |  | Positive regulation of centriole replication              |
| 5888   | RAD51 homolog (S. cerevisiae)                                                       | <i>RAD51</i>     |  | Protein binding                                           |
| 10635  | RAD51 associated protein 1                                                          | <i>RAD51AP1</i>  |  | Protein binding                                           |
| 253714 | MMS22-like, DNA repair protein                                                      | <i>MMS22L</i>    |  | Protein binding                                           |
| 57621  | Zinc finger and BTB domain containing 2                                             | <i>ZBTB2</i>     |  | Protein binding                                           |
| 57099  | Apoptosis, caspase activation inhibitor                                             | <i>AVEN</i>      |  | Protein binding                                           |
| 939    | CD27 molecule                                                                       | <i>CD27</i>      |  | Protein binding                                           |
| 933    | CD22 molecule                                                                       | <i>CD22</i>      |  | Protein binding                                           |
| 7153   | Topoisomerase (DNA) II alpha                                                        | <i>TOP2A</i>     |  | Protein kinase C binding                                  |
| 5341   | Pleckstrin                                                                          | <i>PLEK</i>      |  | Protein kinase C signaling cascade                        |
| 53944  | Casein kinase 1, gamma 1                                                            | <i>CSNK1G1</i>   |  | Protein phosphorylation                                   |
| 10125  | RAS guanyl releasing protein 1 (calcium and DAG-regulated)                          | <i>RASGRP1</i>   |  | Ras protein signal transduction                           |
| 3925   | Stathmin 1                                                                          | <i>STMN1</i>     |  | Response to virus                                         |
| 57082  | Cancer susceptibility candidate 5                                                   | <i>CASC5</i>     |  | Spindle assembly check point                              |
| 255488 | Ring finger protein 144B                                                            | <i>RNF144B</i>   |  | Ubiquitin-ligase activity                                 |
| 4792   | Nuclear factor of kappa light polypeptide gene enhancer in B-cells inhibitor, alpha | <i>NFKBIA</i>    |  | Activates NFKB pathway                                    |
| 7124   | Tumor necrosis factor(TNF superfamily member 2)                                     | <i>TNF</i>       |  | Activation of MAPK activity                               |
| 3119   | Major histocompatibility complex, class II, DQ beta 1                               | <i>HLA-DQB1</i>  |  | Antigen processing and presentation via MHC class II      |
| 22822  | Pleckstrin homology-like domain, family A, member 1                                 | <i>PHLDA1</i>    |  | Apoptosis                                                 |
| 54739  | XIAP associated factor 1 (XAF1)                                                     | <i>XAF1</i>      |  | Apoptosis                                                 |
| 7159   | Tumor protein p53 binding protein, 2                                                | <i>TP53BP2</i>   |  | Apoptosis                                                 |
| 8795   | Tumor necrosis factor receptor superfamily, member 10b                              | <i>TNFRSF10B</i> |  | Apoptosis                                                 |
| 9516   | Lipopolysaccharide-induced TNF factor                                               | <i>LITAF</i>     |  | Apoptosis                                                 |
| 7412   | Vascular cell adhesion molecule                                                     | <i>VCAM1</i>     |  | Cell adhesion                                             |
| 22974  | TPX2, homolog (Xenopuslaevis)                                                       | <i>TPX2</i>      |  | Cell cycle                                                |
| 993    | Cell division cycle 25 homolog A (S. pombe)                                         | <i>CDC25A</i>    |  | Cell cycle                                                |
| 157313 | Cell division cycle associated 2                                                    | <i>CDC42</i>     |  | Cell cycle                                                |
| 4616   | Growth arrest and DNA-damage-inducible, beta                                        | <i>GADD45B</i>   |  | Cell cycle                                                |
| 27085  | Mdm2, p53 binding protein (mouse) binding protein                                   | <i>MTBP</i>      |  | Cell cycle arrest                                         |
| 143686 | Sestrin 3                                                                           | <i>SESN3</i>     |  | Cell cycle arrest                                         |
| 4088   | SMAD family member 3                                                                | <i>SMAD3</i>     |  | Cell cycle arrest                                         |
| 9134   | Cyclin E2                                                                           | <i>CCNE2</i>     |  | Cell cycle checkpoint                                     |
| 3638   | Insulin induced gene 1                                                              | <i>INSIG1</i>    |  | Cell proliferation                                        |
| 6774   | Signal transducer and activator of transcription 3                                  | <i>STAT3</i>     |  | DNA binding                                               |
| 55601  | DEAD (Asp-Glu-Ala-Asp) box polypeptide 60                                           | <i>DDX60</i>     |  | DNA binding                                               |
| 5111   | Proliferating cell nuclear antigen                                                  | <i>PCNA</i>      |  | DNA binding                                               |
| 317    | Apoptotic peptidase activating factor 1                                             | <i>APAF1</i>     |  | DNA fragmentation involved in apoptotic nuclear change    |
| 54107  | Polymerase (DNA directed), epsilon 3 (p17 subunit)                                  | <i>POLE3</i>     |  | DNA replication                                           |
| 990    | Cell division cycle 6 homolog (S. cerevisiae)                                       | <i>CDC6</i>      |  | DNA replication checkpoint                                |
| 6502   | S-phase kinase-associated protein 2 (p45)                                           | <i>SKP2</i>      |  | G1/S transition of mitotic cell cycle                     |
| 6515   | Solute carrier family 2, member 3                                                   | <i>SLC2A3</i>    |  | Glucose transmembrane transporter activity                |
| 5997   | Regulator of G-protein signaling 2                                                  | <i>RGS2</i>      |  | GTPase activator activity                                 |
| 5996   | Regulator of G-protein signaling 1                                                  | <i>RGS1</i>      |  | GTPase activator activity                                 |
| 8743   | TNF ligand                                                                          | <i>TNFSF10</i>   |  | Immune response                                           |
| 2353   | FBJ murine osteosarcoma viral oncogene homolog                                      | <i>FO5</i>       |  | Innate immune response                                    |
| 23586  | DEAD (Asp-Glu-Ala-Asp) box polypeptide 58                                           | <i>DDX58</i>     |  | Innate immune system                                      |
| 7706   | Tripartite motif-containing 25                                                      | <i>TRIM25</i>    |  | Innate immune system                                      |
| 6890   | Transporter 1, ATP-binding cassette(MDR/TAP)                                        | <i>TAP1</i>      |  | Intracellular transport of viral proteins in host cell    |
| 1200   | Tripeptidyl peptidase 1                                                             | <i>TPP1</i>      |  | Lysosome activation                                       |
| 11221  | Dual specificity phosphatase 10                                                     | <i>DUSP10</i>    |  | MAP kinase tyrosine/serine/threonine phosphatase activity |
| 1847   | Dual specificity phosphatase 5                                                      | <i>DUSP5</i>     |  | MAP kinase tyrosine/serine/threonine phosphatase activity |
| 1843   | Dual specificity phosphatase 1                                                      | <i>DUSP1</i>     |  | MAP kinase tyrosine/serine/threonine phosphatase activity |
| 200734 | Sprouty-related, EVH1 domain containing 2                                           | <i>SPRED2</i>    |  | MAPK inactivation                                         |
| 9693   | Rap guanine nucleotide exchange factor (GEF) 2                                      | <i>RAPGEF2</i>   |  | MAPKKK cascade                                            |
| 3105   | Major histocompatibility complex, class I, A                                        | <i>HLA-A</i>     |  | MHC class I receptor activity                             |
| 3106   | Major histocompatibility complex, class I, B                                        | <i>HLA-B</i>     |  | MHC class I receptor activity                             |
| 3107   | Major histocompatibility complex, class I, C                                        | <i>HLA-C</i>     |  | MHC class I receptor activity                             |
| 3135   | Major histocompatibility complex, class I, G                                        | <i>HLA-G</i>     |  | MHC class I receptor activity                             |
| 3134   | Major histocompatibility complex, class I, F                                        | <i>HLA-F</i>     |  | MHC class I receptor activity                             |
| 3133   | Major histocompatibility complex, class I, E                                        | <i>HLA-E</i>     |  | MHC class I receptor activity                             |
| 3108   | Major histocompatibility complex, class II, DM alpha                                | <i>HLA-DMA</i>   |  | MHC class II protein complex                              |
| 1062   | Centromere protein E                                                                | <i>CENPE</i>     |  | Mitotic metaphase                                         |
| 1649   | DNA-damage-inducible transcript 3                                                   | <i>DDIT3</i>     |  | Negative regulation of CREB transcription factor activity |
| 8737   | Receptor (TNFRSF)-interacting serine-threonine kinase 1                             | <i>RIPK1</i>     |  | NFKB pathway activation                                   |
| 23594  | Origin recognition complex, subunit 6                                               | <i>ORC6</i>      |  | Origin recognition complex                                |
| 23175  | Lipin1                                                                              | <i>LPIN1</i>     |  | Phosphatidate phosphatase activity                        |
| 5777   | Protein tyrosine phosphatase, non-receptor type 6                                   | <i>PTPN6</i>     |  | Positive regulation of cell proliferation                 |
| 5880   | Ras-related C3 botulinum toxin substrate 2                                          | <i>RAC2</i>      |  | Positive regulation of cell proliferation                 |
| 7185   | TNF receptor-associated factor 1                                                    | <i>TRAF1</i>     |  | Positive regulation of I-kappaB kinase/NF-kappaB cascade  |
| 5698   | Proteasome                                                                          | <i>PSMB9</i>     |  | Proteasome complex                                        |
| 3070   | Helicase, lymphoid-specific                                                         | <i>HELLS</i>     |  | Protein binding                                           |
| 22985  | Apoptotic chromatin                                                                 | <i>ACIN1</i>     |  | Protein binding                                           |
| 7128   | Tumor necrosis factor, alpha-induced protein 3                                      | <i>TNFAIP3</i>   |  | Protein binding                                           |
| 7431   | Vimentin                                                                            | <i>VIM</i>       |  | Protein kinase binding                                    |
| 54704  | Pyruvate dehydrogenase phosphatase catalytic subunit 1                              | <i>PDP1</i>      |  | Protein serine/threonine phosphatase complex              |
| 51667  | Negative regulator of ubiquitin-like proteins 1                                     | <i>NUB1</i>      |  | Protein ubiquitination                                    |
| 10537  | Ubiquitin D                                                                         | <i>UBD</i>       |  | Protein ubiquitination                                    |
| 10725  | Nuclear factor of activated T-cells 5                                               | <i>NFAT5</i>     |  | Regulation of transcription, DNA-dependent                |
| 3662   | Interferon regulatory factor 4                                                      | <i>IRF4</i>      |  | Regulation of transcription, DNA-dependent                |
| 9636   | ISG15 ubiquitin-like modifier                                                       | <i>ISG15</i>     |  | Response to virus                                         |
| 1130   | Lysosomal trafficking regulator                                                     | <i>LYST</i>      |  | Secretion of lysosomal enzymes                            |
| 5054   | Serpin peptidase inhibitor, clade E, member 1                                       | <i>SERPINE1</i>  |  | Serine-type endopeptidase inhibitor activity              |
| 5272   | Serpin peptidase inhibitor, member 9                                                | <i>SERPINB9</i>  |  | Serine-type endopeptidase inhibitor activity              |
| 334    | Amyloid beta (A4) precursor-like protein 2                                          | <i>APLP2</i>     |  | Serine-type endopeptidase inhibitor activity              |
| 23429  | RING1 and YY1 binding protein                                                       | <i>RYBP</i>      |  | Transcription corepressor activity                        |
| 9966   | TNF ligand                                                                          | <i>TNFSF15</i>   |  | Tumor necrosis factor receptor binding                    |

Expression range

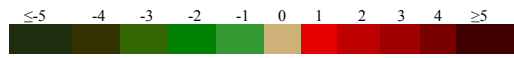

Supplement: d0mo00168f2.pdf [file d0mo00168f2.pdf]
