# Supplementary material for: Temporal gene expression profiling of maslinic acid-treated Raji cells
Source: Royal Society of Chemistry journal article supplement (doi:10.1039/d0mo00168f), 2020-12-08
Supplement: d0mo00168f1.pdf [file d0mo00168f1.pdf]

| EXPERIMENTAL DESIGN                                                                                                                                                                                                                                                                                                                                                                                                                                                                                                                                                                             | ITEM TO CHECK                                                                                                                                                                                                                                                                                                                                                                                                               | IMPORTANCE                                               | CHECKLIST                                                                                                                                                                                                                                                                                                                                                                                                                                                                                                                                                                                                                                      |
|-------------------------------------------------------------------------------------------------------------------------------------------------------------------------------------------------------------------------------------------------------------------------------------------------------------------------------------------------------------------------------------------------------------------------------------------------------------------------------------------------------------------------------------------------------------------------------------------------|-----------------------------------------------------------------------------------------------------------------------------------------------------------------------------------------------------------------------------------------------------------------------------------------------------------------------------------------------------------------------------------------------------------------------------|----------------------------------------------------------|------------------------------------------------------------------------------------------------------------------------------------------------------------------------------------------------------------------------------------------------------------------------------------------------------------------------------------------------------------------------------------------------------------------------------------------------------------------------------------------------------------------------------------------------------------------------------------------------------------------------------------------------|
| <b>EXPERIMENTAL DESIGN</b><br>Definition of experimental and control groups<br>Number within each group<br>Assay carried out by host lab or investigator's lab?<br>Acknowledgement of authors' contributions                                                                                                                                                                                                                                                                                                                                                                                    |                                                                                                                                                                                                                                                                                                                                                                                                                             | E                                                        | <b>Experimental groups:</b> Activated Raji cells treated with maslinic acid (19 µM) and incubated over a time-point period (4h, 8h, 12h, 24h and 48h; n = hours)                                                                                                                                                                                                                                                                                                                                                                                                                                                                               |
|                                                                                                                                                                                                                                                                                                                                                                                                                                                                                                                                                                                                 |                                                                                                                                                                                                                                                                                                                                                                                                                             | E                                                        | <b>Control groups:</b> Activated Raji cells treated with maslinic acid (19 µM) at 0 hour                                                                                                                                                                                                                                                                                                                                                                                                                                                                                                                                                       |
|                                                                                                                                                                                                                                                                                                                                                                                                                                                                                                                                                                                                 |                                                                                                                                                                                                                                                                                                                                                                                                                             | E                                                        | n = 3                                                                                                                                                                                                                                                                                                                                                                                                                                                                                                                                                                                                                                          |
|                                                                                                                                                                                                                                                                                                                                                                                                                                                                                                                                                                                                 |                                                                                                                                                                                                                                                                                                                                                                                                                             | D                                                        |                                                                                                                                                                                                                                                                                                                                                                                                                                                                                                                                                                                                                                                |
| <b>RAW2671</b><br>Description<br>How many times of sample processed<br>Microdissection or macrodissection<br>Processing procedure<br>If frozen - how and how quickly?<br>If fixed - with what, how quickly?<br>Sample storage conditions and duration (especially for FFPE samples)                                                                                                                                                                                                                                                                                                             |                                                                                                                                                                                                                                                                                                                                                                                                                             | E                                                        | Raji cells, derived from human lymphoblastoid cell line were obtained from RKEN cell bank. Only cultures with more than 90% cell viability as determined by trypan blue exclusion method were used for the antitumour-promoting bioassay.                                                                                                                                                                                                                                                                                                                                                                                                      |
|                                                                                                                                                                                                                                                                                                                                                                                                                                                                                                                                                                                                 |                                                                                                                                                                                                                                                                                                                                                                                                                             | D                                                        | 1 x 10 <sup>6</sup> cells/ml of Raji cells                                                                                                                                                                                                                                                                                                                                                                                                                                                                                                                                                                                                     |
|                                                                                                                                                                                                                                                                                                                                                                                                                                                                                                                                                                                                 |                                                                                                                                                                                                                                                                                                                                                                                                                             | D                                                        | RPMI1640 media supplemented with EBV-infected serum. The cell cultures were prepared in triplicates and the cells were maintained at 37 °C in 5% CO <sub>2</sub> atmosphere.                                                                                                                                                                                                                                                                                                                                                                                                                                                                   |
|                                                                                                                                                                                                                                                                                                                                                                                                                                                                                                                                                                                                 |                                                                                                                                                                                                                                                                                                                                                                                                                             | E                                                        | Upon time-point incubation completion, cells were collected via centrifugation and (nucleic acid) extracted for downstream processing                                                                                                                                                                                                                                                                                                                                                                                                                                                                                                          |
| <b>NUCLEIC ACID EXTRACTION</b><br>Procedure and/or instrumentation<br>Name of kit and details of any modifications<br>Source of additional reagents used<br>Details of DNase or RNase treatment<br>Contamination assessment (DNA or RNA)<br>Nucleic acid quantification<br>Instrument and method<br>Dye(s) (A260/A280)<br>Yield<br>RNA integrity method/instrument<br>RIN/RQ1 or Co of 3- and 5' transcripts<br>Electrophoresis traces<br>Inhibition testing (CA dilutions, spike or other)                                                                                                     |                                                                                                                                                                                                                                                                                                                                                                                                                             | E                                                        | Samples prepared fresh prior to nucleic acid extraction                                                                                                                                                                                                                                                                                                                                                                                                                                                                                                                                                                                        |
|                                                                                                                                                                                                                                                                                                                                                                                                                                                                                                                                                                                                 |                                                                                                                                                                                                                                                                                                                                                                                                                             | E                                                        | A total of 1 x 10 <sup>6</sup> cells/ml of Raji cells were incubated in 2 ml of RPMI complete growth medium containing 3 mM of S-ME, 0.05 µM PMA and 19 µM maslinic acid at 37 °C in 5 % CO <sub>2</sub> atmosphere for 48 hours. The cells were harvested periodically at 0, 4, 8, 12, 24 and 48 hours and the samples were processed immediately with Total RNA/Protein extraction kit (Machery-Nagel, Germany). Eluted RNA and solubilised protein were stored in aliquots at -80 °C until further use.                                                                                                                                     |
|                                                                                                                                                                                                                                                                                                                                                                                                                                                                                                                                                                                                 |                                                                                                                                                                                                                                                                                                                                                                                                                             | E                                                        | Total RNA/Protein extraction kit (Machery-Nagel, Germany)                                                                                                                                                                                                                                                                                                                                                                                                                                                                                                                                                                                      |
|                                                                                                                                                                                                                                                                                                                                                                                                                                                                                                                                                                                                 |                                                                                                                                                                                                                                                                                                                                                                                                                             | E                                                        | RNaseZap® (Thermo Fisher Scientific, Cat #AM9786)                                                                                                                                                                                                                                                                                                                                                                                                                                                                                                                                                                                              |
|                                                                                                                                                                                                                                                                                                                                                                                                                                                                                                                                                                                                 |                                                                                                                                                                                                                                                                                                                                                                                                                             | E                                                        | RNA concentration was determined by measuring the absorbance at 260 nm UV light                                                                                                                                                                                                                                                                                                                                                                                                                                                                                                                                                                |
|                                                                                                                                                                                                                                                                                                                                                                                                                                                                                                                                                                                                 |                                                                                                                                                                                                                                                                                                                                                                                                                             | E                                                        | Nanodrop® UV-Vis Spectrophotometer (Impden, Germany) and 1.2 % denaturing agarose gel.                                                                                                                                                                                                                                                                                                                                                                                                                                                                                                                                                         |
|                                                                                                                                                                                                                                                                                                                                                                                                                                                                                                                                                                                                 |                                                                                                                                                                                                                                                                                                                                                                                                                             | D                                                        | 1.5-2.0                                                                                                                                                                                                                                                                                                                                                                                                                                                                                                                                                                                                                                        |
|                                                                                                                                                                                                                                                                                                                                                                                                                                                                                                                                                                                                 |                                                                                                                                                                                                                                                                                                                                                                                                                             | D                                                        |                                                                                                                                                                                                                                                                                                                                                                                                                                                                                                                                                                                                                                                |
|                                                                                                                                                                                                                                                                                                                                                                                                                                                                                                                                                                                                 |                                                                                                                                                                                                                                                                                                                                                                                                                             | E                                                        | RNA integrity as evaluated using 1.2 % denaturing agarose gel.                                                                                                                                                                                                                                                                                                                                                                                                                                                                                                                                                                                 |
|                                                                                                                                                                                                                                                                                                                                                                                                                                                                                                                                                                                                 |                                                                                                                                                                                                                                                                                                                                                                                                                             | E                                                        |                                                                                                                                                                                                                                                                                                                                                                                                                                                                                                                                                                                                                                                |
|                                                                                                                                                                                                                                                                                                                                                                                                                                                                                                                                                                                                 |                                                                                                                                                                                                                                                                                                                                                                                                                             | E                                                        |                                                                                                                                                                                                                                                                                                                                                                                                                                                                                                                                                                                                                                                |
|                                                                                                                                                                                                                                                                                                                                                                                                                                                                                                                                                                                                 | <b>REVERSE TRANSCRIPTION</b><br>Complete reaction conditions<br>Amount of RNA and reaction volume<br>Priming oligonucleotide (if using GSP) and concentration<br>Reverse transcriptase and concentration                                                                                                                                                                                                                    |                                                          | E                                                                                                                                                                                                                                                                                                                                                                                                                                                                                                                                                                                                                                              |
|                                                                                                                                                                                                                                                                                                                                                                                                                                                                                                                                                                                                 |                                                                                                                                                                                                                                                                                                                                                                                                                             | E                                                        | 20 ng/ml                                                                                                                                                                                                                                                                                                                                                                                                                                                                                                                                                                                                                                       |
|                                                                                                                                                                                                                                                                                                                                                                                                                                                                                                                                                                                                 |                                                                                                                                                                                                                                                                                                                                                                                                                             | E                                                        | RNA was used to generate biotin-labeled cDNA with the Applause WT-Amp ST System (NuGEN, CA) kit                                                                                                                                                                                                                                                                                                                                                                                                                                                                                                                                                |
|                                                                                                                                                                                                                                                                                                                                                                                                                                                                                                                                                                                                 |                                                                                                                                                                                                                                                                                                                                                                                                                             | E                                                        | As prepared by Applause WT-Amp ST System (NuGEN, CA) kit in the form of a mastermix                                                                                                                                                                                                                                                                                                                                                                                                                                                                                                                                                            |
|                                                                                                                                                                                                                                                                                                                                                                                                                                                                                                                                                                                                 |                                                                                                                                                                                                                                                                                                                                                                                                                             | E                                                        | Program 1<br>Primer Annealing 65°C – 5 min, hold at 4°C                                                                                                                                                                                                                                                                                                                                                                                                                                                                                                                                                                                        |
|                                                                                                                                                                                                                                                                                                                                                                                                                                                                                                                                                                                                 |                                                                                                                                                                                                                                                                                                                                                                                                                             | E                                                        | Program 2<br>First Strand Synthesis<br>4°C – 1 min, 25°C – 10 min, 42°C – 10 min, 70°C – 15 min, hold at 4°C                                                                                                                                                                                                                                                                                                                                                                                                                                                                                                                                   |
|                                                                                                                                                                                                                                                                                                                                                                                                                                                                                                                                                                                                 |                                                                                                                                                                                                                                                                                                                                                                                                                             | E                                                        | SECOND STRAND cDNA SYNTHESIS<br>Program 3<br>Second Strand Synthesis<br>4°C – 1 min, 25°C – 10 min, 50°C – 30 min, 70°C – 5 min, hold at 4°C                                                                                                                                                                                                                                                                                                                                                                                                                                                                                                   |
|                                                                                                                                                                                                                                                                                                                                                                                                                                                                                                                                                                                                 |                                                                                                                                                                                                                                                                                                                                                                                                                             | E                                                        | POST-SECOND STRAND ENHANCEMENT<br>Program 4<br>Post-Second Strand Enhancement<br>4°C – 1 min, 37°C – 15 min, 80°C – 20 min, hold at 4°C                                                                                                                                                                                                                                                                                                                                                                                                                                                                                                        |
|                                                                                                                                                                                                                                                                                                                                                                                                                                                                                                                                                                                                 |                                                                                                                                                                                                                                                                                                                                                                                                                             | E                                                        | SPIN AMPLIFICATION<br>Program 5<br>SPIN Amplification<br>4°C – 1 min, 47°C – 90 min, 95°C – 5 min, hold at 4°C                                                                                                                                                                                                                                                                                                                                                                                                                                                                                                                                 |
|                                                                                                                                                                                                                                                                                                                                                                                                                                                                                                                                                                                                 |                                                                                                                                                                                                                                                                                                                                                                                                                             | E                                                        | POST-SPIN MODIFICATION<br>Program 6<br>Post-SPIN Modification 1<br>4°C – 1 min, 37°C – 15 min, 95°C – 5 min, hold at 4°C                                                                                                                                                                                                                                                                                                                                                                                                                                                                                                                       |
|                                                                                                                                                                                                                                                                                                                                                                                                                                                                                                                                                                                                 |                                                                                                                                                                                                                                                                                                                                                                                                                             | E                                                        | Program 7<br>Applause WT-Amp ST System (NuGEN, CA) kit                                                                                                                                                                                                                                                                                                                                                                                                                                                                                                                                                                                         |
|                                                                                                                                                                                                                                                                                                                                                                                                                                                                                                                                                                                                 |                                                                                                                                                                                                                                                                                                                                                                                                                             | D                                                        | Manufacturer of reagents and catalogue numbers                                                                                                                                                                                                                                                                                                                                                                                                                                                                                                                                                                                                 |
|                                                                                                                                                                                                                                                                                                                                                                                                                                                                                                                                                                                                 | D*                                                                                                                                                                                                                                                                                                                                                                                                                          | Kit with and without RT                                  |                                                                                                                                                                                                                                                                                                                                                                                                                                                                                                                                                                                                                                                |
|                                                                                                                                                                                                                                                                                                                                                                                                                                                                                                                                                                                                 | D*                                                                                                                                                                                                                                                                                                                                                                                                                          | Storage conditions of cDNA                               |                                                                                                                                                                                                                                                                                                                                                                                                                                                                                                                                                                                                                                                |
| <b>qPCR TARGET INFORMATION</b><br>If multiplex, efficiency and LOD of each assay.                                                                                                                                                                                                                                                                                                                                                                                                                                                                                                               |                                                                                                                                                                                                                                                                                                                                                                                                                             | E                                                        | Solatis pre-designed assay<br>AX-004597-00-0200<br>Solatis Human qPCR Gene Expression Assay, Human XAF1 (54739)<br>AX-007881-00-0100<br>Solatis Human qPCR Gene Expression Assay, Human CXCL9 (4283)<br>AX-004599-00-0200<br>Solatis Human qPCR Gene Expression Assay, Human IFI44L (10964)<br>AX-012511-00-0100<br>Solatis Human qPCR Gene Expression Assay, Human DDX58 (23586)<br>AX009788-00-0200<br>Solatis Human qPCR Gene Expression Assay, Human OAS2 (4939)<br>AX-004235-00-0100<br>Solatis Human qPCR Gene Expression Assay, Human ISG15 (9636)<br>AX-004293-00-0100<br>Solatis Human qPCR Gene Expression Assay, Human GAPDH (2597) |
|                                                                                                                                                                                                                                                                                                                                                                                                                                                                                                                                                                                                 |                                                                                                                                                                                                                                                                                                                                                                                                                             | D                                                        | Sequence accession number                                                                                                                                                                                                                                                                                                                                                                                                                                                                                                                                                                                                                      |
|                                                                                                                                                                                                                                                                                                                                                                                                                                                                                                                                                                                                 |                                                                                                                                                                                                                                                                                                                                                                                                                             | D                                                        | Location of amplicon                                                                                                                                                                                                                                                                                                                                                                                                                                                                                                                                                                                                                           |
|                                                                                                                                                                                                                                                                                                                                                                                                                                                                                                                                                                                                 |                                                                                                                                                                                                                                                                                                                                                                                                                             | E                                                        | Amplicon length                                                                                                                                                                                                                                                                                                                                                                                                                                                                                                                                                                                                                                |
|                                                                                                                                                                                                                                                                                                                                                                                                                                                                                                                                                                                                 |                                                                                                                                                                                                                                                                                                                                                                                                                             | E                                                        | BLAST analysis is a critical component of any comprehensive qPCR assay design protocol and BLAST analysis has been integrated into the Solatis design algorithm. The algorithm utilizes genomic transcript and pseudogene databases to identify and eliminate sequences that are more likely to lead to erroneous priming and detection (i.e. off-target effects).                                                                                                                                                                                                                                                                             |
|                                                                                                                                                                                                                                                                                                                                                                                                                                                                                                                                                                                                 |                                                                                                                                                                                                                                                                                                                                                                                                                             | D                                                        | In silico specificity screen (BLAST, etc)                                                                                                                                                                                                                                                                                                                                                                                                                                                                                                                                                                                                      |
|                                                                                                                                                                                                                                                                                                                                                                                                                                                                                                                                                                                                 |                                                                                                                                                                                                                                                                                                                                                                                                                             | D                                                        | Pseudogenes, retrospseudogenes or other homologs?                                                                                                                                                                                                                                                                                                                                                                                                                                                                                                                                                                                              |
|                                                                                                                                                                                                                                                                                                                                                                                                                                                                                                                                                                                                 |                                                                                                                                                                                                                                                                                                                                                                                                                             | D                                                        | Sequence alignment                                                                                                                                                                                                                                                                                                                                                                                                                                                                                                                                                                                                                             |
|                                                                                                                                                                                                                                                                                                                                                                                                                                                                                                                                                                                                 |                                                                                                                                                                                                                                                                                                                                                                                                                             | D                                                        | Secondary structure analysis of amplicon                                                                                                                                                                                                                                                                                                                                                                                                                                                                                                                                                                                                       |
|                                                                                                                                                                                                                                                                                                                                                                                                                                                                                                                                                                                                 |                                                                                                                                                                                                                                                                                                                                                                                                                             | E                                                        | Location of each primer by exon or intron (if applicable)                                                                                                                                                                                                                                                                                                                                                                                                                                                                                                                                                                                      |
|                                                                                                                                                                                                                                                                                                                                                                                                                                                                                                                                                                                                 |                                                                                                                                                                                                                                                                                                                                                                                                                             | E                                                        | Which splice variants are targeted?                                                                                                                                                                                                                                                                                                                                                                                                                                                                                                                                                                                                            |
|                                                                                                                                                                                                                                                                                                                                                                                                                                                                                                                                                                                                 | <b>qPCR ASSAY CHARACTERISTICS</b><br>Primer sequences<br>RT/Reverse-Transcriptase Identification Number<br>Probe sequences<br>Location and identity of any modifications<br>Manufacturer of oligonucleotides<br>Buffers<br>Buffers (SYBR Green I, DMSO, etc.)<br>Manufacturer of plates/tubes and catalog number<br>Complete thermocycling parameters<br>Reaction setup (manual/robotic)<br>Manufacturer of qPCR instrument |                                                          | E                                                                                                                                                                                                                                                                                                                                                                                                                                                                                                                                                                                                                                              |
|                                                                                                                                                                                                                                                                                                                                                                                                                                                                                                                                                                                                 |                                                                                                                                                                                                                                                                                                                                                                                                                             | E                                                        | Primer sequences                                                                                                                                                                                                                                                                                                                                                                                                                                                                                                                                                                                                                               |
|                                                                                                                                                                                                                                                                                                                                                                                                                                                                                                                                                                                                 |                                                                                                                                                                                                                                                                                                                                                                                                                             | D                                                        | RT/Reverse-Transcriptase Identification Number                                                                                                                                                                                                                                                                                                                                                                                                                                                                                                                                                                                                 |
|                                                                                                                                                                                                                                                                                                                                                                                                                                                                                                                                                                                                 |                                                                                                                                                                                                                                                                                                                                                                                                                             | D*                                                       | Probe sequences                                                                                                                                                                                                                                                                                                                                                                                                                                                                                                                                                                                                                                |
|                                                                                                                                                                                                                                                                                                                                                                                                                                                                                                                                                                                                 |                                                                                                                                                                                                                                                                                                                                                                                                                             | D                                                        | Location and identity of any modifications                                                                                                                                                                                                                                                                                                                                                                                                                                                                                                                                                                                                     |
|                                                                                                                                                                                                                                                                                                                                                                                                                                                                                                                                                                                                 |                                                                                                                                                                                                                                                                                                                                                                                                                             | D                                                        | Manufacturer of oligonucleotides                                                                                                                                                                                                                                                                                                                                                                                                                                                                                                                                                                                                               |
|                                                                                                                                                                                                                                                                                                                                                                                                                                                                                                                                                                                                 |                                                                                                                                                                                                                                                                                                                                                                                                                             | D                                                        | Buffers                                                                                                                                                                                                                                                                                                                                                                                                                                                                                                                                                                                                                                        |
|                                                                                                                                                                                                                                                                                                                                                                                                                                                                                                                                                                                                 |                                                                                                                                                                                                                                                                                                                                                                                                                             | E                                                        | Buffers (SYBR Green I, DMSO, etc.)                                                                                                                                                                                                                                                                                                                                                                                                                                                                                                                                                                                                             |
|                                                                                                                                                                                                                                                                                                                                                                                                                                                                                                                                                                                                 |                                                                                                                                                                                                                                                                                                                                                                                                                             | D                                                        | Manufacturer of plates/tubes and catalog number                                                                                                                                                                                                                                                                                                                                                                                                                                                                                                                                                                                                |
|                                                                                                                                                                                                                                                                                                                                                                                                                                                                                                                                                                                                 |                                                                                                                                                                                                                                                                                                                                                                                                                             | E                                                        | Complete thermocycling parameters                                                                                                                                                                                                                                                                                                                                                                                                                                                                                                                                                                                                              |
|                                                                                                                                                                                                                                                                                                                                                                                                                                                                                                                                                                                                 |                                                                                                                                                                                                                                                                                                                                                                                                                             | D                                                        | Reaction setup (manual/robotic)                                                                                                                                                                                                                                                                                                                                                                                                                                                                                                                                                                                                                |
|                                                                                                                                                                                                                                                                                                                                                                                                                                                                                                                                                                                                 |                                                                                                                                                                                                                                                                                                                                                                                                                             | E                                                        | Manufacturer of qPCR instrument                                                                                                                                                                                                                                                                                                                                                                                                                                                                                                                                                                                                                |
|                                                                                                                                                                                                                                                                                                                                                                                                                                                                                                                                                                                                 | E                                                                                                                                                                                                                                                                                                                                                                                                                           | Rotor-Gene Thermal-cycler (Qiagen, Germany)              |                                                                                                                                                                                                                                                                                                                                                                                                                                                                                                                                                                                                                                                |
| <b>qPCR VALIDATION</b><br>Evidence of optimisation (from gradients)<br>Specificity (self, sequence, melt, all digest)<br>For SYBR Green I, Co of the NTC<br>Standard curves with slope and variance<br>PCR efficiency calculated from slope<br>Confidence interval for PCR efficiency or standard error<br>Z of standard curve<br>Linear dynamic range<br>Co variation at lower limit<br>Confidence intervals throughout range<br>Evidence for limit of detection<br>Multiplex efficiency and LOD of each assay.                                                                                |                                                                                                                                                                                                                                                                                                                                                                                                                             | E                                                        | Reaction contains 1 µl of cDNA aliquot and 9 µl of Solatis qPCR mastermix. The cycling conditions comprise a 15 minutes enzyme activation step at 95°C, followed by 40 cycles of denaturation step at 95°C for 15 seconds and annealing/extension step at 60°C for 60 seconds. The expression of the selected genes were normalized to a housekeeping gene, GAPDH.                                                                                                                                                                                                                                                                             |
|                                                                                                                                                                                                                                                                                                                                                                                                                                                                                                                                                                                                 |                                                                                                                                                                                                                                                                                                                                                                                                                             | E                                                        | 10 µl                                                                                                                                                                                                                                                                                                                                                                                                                                                                                                                                                                                                                                          |
|                                                                                                                                                                                                                                                                                                                                                                                                                                                                                                                                                                                                 |                                                                                                                                                                                                                                                                                                                                                                                                                             | E                                                        | 500 nM of forward and reverse primers each and 200 nM of gene specific probe                                                                                                                                                                                                                                                                                                                                                                                                                                                                                                                                                                   |
|                                                                                                                                                                                                                                                                                                                                                                                                                                                                                                                                                                                                 |                                                                                                                                                                                                                                                                                                                                                                                                                             | E                                                        | Solatis qPCR mastermix (Thermo Scientific, USA)                                                                                                                                                                                                                                                                                                                                                                                                                                                                                                                                                                                                |
|                                                                                                                                                                                                                                                                                                                                                                                                                                                                                                                                                                                                 |                                                                                                                                                                                                                                                                                                                                                                                                                             | E                                                        | Solatis qPCR mastermix (Thermo Scientific, USA)                                                                                                                                                                                                                                                                                                                                                                                                                                                                                                                                                                                                |
|                                                                                                                                                                                                                                                                                                                                                                                                                                                                                                                                                                                                 |                                                                                                                                                                                                                                                                                                                                                                                                                             | E                                                        | Solatis qPCR mastermix (Thermo Scientific, USA)                                                                                                                                                                                                                                                                                                                                                                                                                                                                                                                                                                                                |
|                                                                                                                                                                                                                                                                                                                                                                                                                                                                                                                                                                                                 |                                                                                                                                                                                                                                                                                                                                                                                                                             | E                                                        | 15 minutes enzyme activation step at 95°C, followed by 40 cycles of denaturation step at 95°C for 15 seconds and annealing/extension step at 60°C for 60 seconds.                                                                                                                                                                                                                                                                                                                                                                                                                                                                              |
|                                                                                                                                                                                                                                                                                                                                                                                                                                                                                                                                                                                                 |                                                                                                                                                                                                                                                                                                                                                                                                                             | E                                                        | Rotor-Gene Thermal-cycler (Qiagen, Germany)                                                                                                                                                                                                                                                                                                                                                                                                                                                                                                                                                                                                    |
|                                                                                                                                                                                                                                                                                                                                                                                                                                                                                                                                                                                                 |                                                                                                                                                                                                                                                                                                                                                                                                                             | D                                                        | Evidence of optimisation (from gradients)                                                                                                                                                                                                                                                                                                                                                                                                                                                                                                                                                                                                      |
|                                                                                                                                                                                                                                                                                                                                                                                                                                                                                                                                                                                                 |                                                                                                                                                                                                                                                                                                                                                                                                                             | E                                                        | Assay is pre-optimised as per suggested by manufacturer (Solatis pre-designed assays)                                                                                                                                                                                                                                                                                                                                                                                                                                                                                                                                                          |
|                                                                                                                                                                                                                                                                                                                                                                                                                                                                                                                                                                                                 |                                                                                                                                                                                                                                                                                                                                                                                                                             | E                                                        | Evaluated from the melt curve of the assay, no template control was included in every run                                                                                                                                                                                                                                                                                                                                                                                                                                                                                                                                                      |
|                                                                                                                                                                                                                                                                                                                                                                                                                                                                                                                                                                                                 |                                                                                                                                                                                                                                                                                                                                                                                                                             | E                                                        | For SYBR Green I, Co of the NTC                                                                                                                                                                                                                                                                                                                                                                                                                                                                                                                                                                                                                |
|                                                                                                                                                                                                                                                                                                                                                                                                                                                                                                                                                                                                 | E                                                                                                                                                                                                                                                                                                                                                                                                                           | Standard curves with slope and variance                  |                                                                                                                                                                                                                                                                                                                                                                                                                                                                                                                                                                                                                                                |
|                                                                                                                                                                                                                                                                                                                                                                                                                                                                                                                                                                                                 | E                                                                                                                                                                                                                                                                                                                                                                                                                           | PCR efficiency calculated from slope                     |                                                                                                                                                                                                                                                                                                                                                                                                                                                                                                                                                                                                                                                |
|                                                                                                                                                                                                                                                                                                                                                                                                                                                                                                                                                                                                 | D                                                                                                                                                                                                                                                                                                                                                                                                                           | Confidence interval for PCR efficiency or standard error |                                                                                                                                                                                                                                                                                                                                                                                                                                                                                                                                                                                                                                                |
|                                                                                                                                                                                                                                                                                                                                                                                                                                                                                                                                                                                                 | E                                                                                                                                                                                                                                                                                                                                                                                                                           | Z of standard curve                                      |                                                                                                                                                                                                                                                                                                                                                                                                                                                                                                                                                                                                                                                |
|                                                                                                                                                                                                                                                                                                                                                                                                                                                                                                                                                                                                 | E                                                                                                                                                                                                                                                                                                                                                                                                                           | Linear dynamic range                                     |                                                                                                                                                                                                                                                                                                                                                                                                                                                                                                                                                                                                                                                |
|                                                                                                                                                                                                                                                                                                                                                                                                                                                                                                                                                                                                 | E                                                                                                                                                                                                                                                                                                                                                                                                                           | Co variation at lower limit                              |                                                                                                                                                                                                                                                                                                                                                                                                                                                                                                                                                                                                                                                |
|                                                                                                                                                                                                                                                                                                                                                                                                                                                                                                                                                                                                 | E                                                                                                                                                                                                                                                                                                                                                                                                                           | Confidence intervals throughout range                    |                                                                                                                                                                                                                                                                                                                                                                                                                                                                                                                                                                                                                                                |
|                                                                                                                                                                                                                                                                                                                                                                                                                                                                                                                                                                                                 | E                                                                                                                                                                                                                                                                                                                                                                                                                           | Evidence for limit of detection                          |                                                                                                                                                                                                                                                                                                                                                                                                                                                                                                                                                                                                                                                |
|                                                                                                                                                                                                                                                                                                                                                                                                                                                                                                                                                                                                 | E                                                                                                                                                                                                                                                                                                                                                                                                                           | Multiplex efficiency and LOD of each assay.              |                                                                                                                                                                                                                                                                                                                                                                                                                                                                                                                                                                                                                                                |
| <b>DNA ANALYSIS</b><br>qPCR analysis program (source, version)<br>Co method determination<br>Outlier identification and disposition<br>Results of NTCs<br>Justification of number and choice of reference genes<br>Description of normalisation method<br>Number and concordance of biological replicates<br>Number and stage (RT or qPCR) of technical replicates<br>Repeatability (intra-assay variation)<br>Reproducibility (inter-assay variation, %CV)<br>Power analysis<br>Statistical methods for result significance<br>Software (source, version)<br>Co raw data submission using RDM. |                                                                                                                                                                                                                                                                                                                                                                                                                             | E                                                        | Rotor-Gen® Q                                                                                                                                                                                                                                                                                                                                                                                                                                                                                                                                                                                                                                   |
|                                                                                                                                                                                                                                                                                                                                                                                                                                                                                                                                                                                                 |                                                                                                                                                                                                                                                                                                                                                                                                                             | E                                                        | Co method determination                                                                                                                                                                                                                                                                                                                                                                                                                                                                                                                                                                                                                        |
|                                                                                                                                                                                                                                                                                                                                                                                                                                                                                                                                                                                                 |                                                                                                                                                                                                                                                                                                                                                                                                                             | E                                                        | Outlier identification and disposition                                                                                                                                                                                                                                                                                                                                                                                                                                                                                                                                                                                                         |
|                                                                                                                                                                                                                                                                                                                                                                                                                                                                                                                                                                                                 |                                                                                                                                                                                                                                                                                                                                                                                                                             | E                                                        | Results of NTCs                                                                                                                                                                                                                                                                                                                                                                                                                                                                                                                                                                                                                                |
|                                                                                                                                                                                                                                                                                                                                                                                                                                                                                                                                                                                                 |                                                                                                                                                                                                                                                                                                                                                                                                                             | E                                                        | Justification of number and choice of reference genes                                                                                                                                                                                                                                                                                                                                                                                                                                                                                                                                                                                          |
|                                                                                                                                                                                                                                                                                                                                                                                                                                                                                                                                                                                                 |                                                                                                                                                                                                                                                                                                                                                                                                                             | D                                                        | Description of normalisation method                                                                                                                                                                                                                                                                                                                                                                                                                                                                                                                                                                                                            |
|                                                                                                                                                                                                                                                                                                                                                                                                                                                                                                                                                                                                 |                                                                                                                                                                                                                                                                                                                                                                                                                             | D                                                        | Number and concordance of biological replicates                                                                                                                                                                                                                                                                                                                                                                                                                                                                                                                                                                                                |
|                                                                                                                                                                                                                                                                                                                                                                                                                                                                                                                                                                                                 |                                                                                                                                                                                                                                                                                                                                                                                                                             | E                                                        | n = 3 technical replicates                                                                                                                                                                                                                                                                                                                                                                                                                                                                                                                                                                                                                     |
|                                                                                                                                                                                                                                                                                                                                                                                                                                                                                                                                                                                                 |                                                                                                                                                                                                                                                                                                                                                                                                                             | D                                                        | Number and stage (RT or qPCR) of technical replicates                                                                                                                                                                                                                                                                                                                                                                                                                                                                                                                                                                                          |
|                                                                                                                                                                                                                                                                                                                                                                                                                                                                                                                                                                                                 |                                                                                                                                                                                                                                                                                                                                                                                                                             | E                                                        | Repeatability (intra-assay variation)                                                                                                                                                                                                                                                                                                                                                                                                                                                                                                                                                                                                          |
|                                                                                                                                                                                                                                                                                                                                                                                                                                                                                                                                                                                                 |                                                                                                                                                                                                                                                                                                                                                                                                                             | D                                                        | Reproducibility (inter-assay variation, %CV)                                                                                                                                                                                                                                                                                                                                                                                                                                                                                                                                                                                                   |
|                                                                                                                                                                                                                                                                                                                                                                                                                                                                                                                                                                                                 |                                                                                                                                                                                                                                                                                                                                                                                                                             | E                                                        | Power analysis                                                                                                                                                                                                                                                                                                                                                                                                                                                                                                                                                                                                                                 |
|                                                                                                                                                                                                                                                                                                                                                                                                                                                                                                                                                                                                 | E                                                                                                                                                                                                                                                                                                                                                                                                                           | Statistical methods for result significance              |                                                                                                                                                                                                                                                                                                                                                                                                                                                                                                                                                                                                                                                |
|                                                                                                                                                                                                                                                                                                                                                                                                                                                                                                                                                                                                 | E                                                                                                                                                                                                                                                                                                                                                                                                                           | Software (source, version)                               |                                                                                                                                                                                                                                                                                                                                                                                                                                                                                                                                                                                                                                                |
|                                                                                                                                                                                                                                                                                                                                                                                                                                                                                                                                                                                                 | D                                                                                                                                                                                                                                                                                                                                                                                                                           | Co raw data submission using RDM.                        |                                                                                                                                                                                                                                                                                                                                                                                                                                                                                                                                                                                                                                                |

Table 1. MIQE checklist for authors, reviewers and editors. All essential information (E) must be submitted with the manuscript. Desirable information (D) should be submitted if available. If using primers obtained from RThimerDB, information on qPCR target, oligonucleotides, protocols and validation is available from that source.

\* Assessing the absence of DNA using a no RT assay is essential when first extracting RNA. Once the sample has been validated as RNA-free, inclusion of a no-RT control is desirable, but no longer essential.

\*\* Disclosure of the probe sequence is highly desirable and strongly encouraged. However, since not all commercial pre-designed assays vendors provide this information, it cannot be an essential requirement. Use of such assays is advised against.
